# Supplementary material for: Hypometabolism in the supplementary and anterior cingulate cortices is related to dysphagia in Parkinson's disease: a cross-sectional and 3-year longitudinal cohort study
Source: PubMed Central journal article supplement — BMJ Open. 2013 Mar 1;3(3):e002249. doi: 10.1136/bmjopen-2012-002249 (PMC3612769; doi:10.1136/bmjopen-2012-002249), 2013-03-01
Supplement: bmjopen-2012-002249.draft_revisions.pdf [file bmjopen-2012-002249.draft_revisions.pdf]

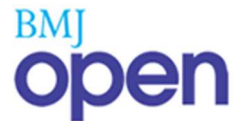

**Hypometabolism in the supplementary and anterior cingulate cortices is related to dysphagia in Parkinson's disease: a cross-sectional and 3-year longitudinal cohort study**

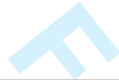

|                                 |                                                                                                                                                                                                                                                                                                                                                                                                                                                                                                                                                                                                                                                                                                                                                                                                                                                                                                                                                                                                                                                                                                                                                                                                                                                                                                                                                                                                                                                                                                                                                                                                                                                                                                                                                                                                                                                                                                                                                                                                                                  |
|---------------------------------|----------------------------------------------------------------------------------------------------------------------------------------------------------------------------------------------------------------------------------------------------------------------------------------------------------------------------------------------------------------------------------------------------------------------------------------------------------------------------------------------------------------------------------------------------------------------------------------------------------------------------------------------------------------------------------------------------------------------------------------------------------------------------------------------------------------------------------------------------------------------------------------------------------------------------------------------------------------------------------------------------------------------------------------------------------------------------------------------------------------------------------------------------------------------------------------------------------------------------------------------------------------------------------------------------------------------------------------------------------------------------------------------------------------------------------------------------------------------------------------------------------------------------------------------------------------------------------------------------------------------------------------------------------------------------------------------------------------------------------------------------------------------------------------------------------------------------------------------------------------------------------------------------------------------------------------------------------------------------------------------------------------------------------|
| Journal:                        | <i>BMJ Open</i>                                                                                                                                                                                                                                                                                                                                                                                                                                                                                                                                                                                                                                                                                                                                                                                                                                                                                                                                                                                                                                                                                                                                                                                                                                                                                                                                                                                                                                                                                                                                                                                                                                                                                                                                                                                                                                                                                                                                                                                                                  |
| Manuscript ID:                  | bmjopen-2012-002249                                                                                                                                                                                                                                                                                                                                                                                                                                                                                                                                                                                                                                                                                                                                                                                                                                                                                                                                                                                                                                                                                                                                                                                                                                                                                                                                                                                                                                                                                                                                                                                                                                                                                                                                                                                                                                                                                                                                                                                                              |
| Article Type:                   | Research                                                                                                                                                                                                                                                                                                                                                                                                                                                                                                                                                                                                                                                                                                                                                                                                                                                                                                                                                                                                                                                                                                                                                                                                                                                                                                                                                                                                                                                                                                                                                                                                                                                                                                                                                                                                                                                                                                                                                                                                                         |
| Date Submitted by the Author:   | 22-Oct-2012                                                                                                                                                                                                                                                                                                                                                                                                                                                                                                                                                                                                                                                                                                                                                                                                                                                                                                                                                                                                                                                                                                                                                                                                                                                                                                                                                                                                                                                                                                                                                                                                                                                                                                                                                                                                                                                                                                                                                                                                                      |
| Complete List of Authors:       | <p>Kikuchi, Akio; Tohoku University Graduate School of Medicine, Department of Neurology<br/>         Baba, Toru; Tohoku University Graduate School of Medicine, Department of Neurology<br/>         Hasegawa, Takafumi; Tohoku University Graduate School of Medicine, Department of Neurology<br/>         Kobayashi, Michiko; Tohoku University Graduate School of Medicine, Department of Neurology<br/>         Sugeno, Naoto; Tohoku University Graduate School of Medicine, Department of Neurology<br/>         Konno, Masatoshi; Tohoku University Graduate School of Medicine, Department of Neurology<br/>         Miura, Emiko; Tohoku University Graduate School of Medicine, Department of Neurology<br/>         Hosokai, Yoshiyuki; Tohoku University Graduate School of Medicine, Department of Behavioral Neurology and Cognitive Neuroscience<br/>         Ishioka, Toshiyuki; Saitama Prefectural University, Department of Occupational Therapy<br/>         Nishio, Yoshiyuki; Tohoku University Graduate School of Medicine, Department of Behavioral Neurology and Cognitive Neuroscience<br/>         Hirayama, Kazumi; Yamagata Prefectural University of Health Sciences, Department of Occupational Therapy<br/>         Suzuki, Kyoko; Yamagata University Graduate School of Medicine, Department of Clinical Neuroscience<br/>         Aoki, Masashi; Tohoku University Graduate School of Medicine, Department of Neurology<br/>         Takahashi, Shoki; Tohoku University Graduate School of Medicine, Department of Diagnostic Radiology<br/>         Fukuda, Hiroshi; Tohoku University, Department of Nuclear Medicine and Radiology<br/>         Itoyama, Yasuto; National Center of Neurology and Psychiatry, National Center Hospital<br/>         Mori, Etsuro; Tohoku University Graduate School of Medicine, Department of Behavioral Neurology and Cognitive Neuroscience<br/>         Takeda, Atsushi; Tohoku University Graduate School of Medicine, Department of Neurology</p> |
| <b>Primary Subject Heading</b>: | Neurology                                                                                                                                                                                                                                                                                                                                                                                                                                                                                                                                                                                                                                                                                                                                                                                                                                                                                                                                                                                                                                                                                                                                                                                                                                                                                                                                                                                                                                                                                                                                                                                                                                                                                                                                                                                                                                                                                                                                                                                                                        |

1  
2  
3  
4  
5  
6  
7  
8  
9  
10  
11  
12  
13  
14  
15  
16  
17  
18  
19  
20  
21  
22  
23  
24  
25  
26  
27  
28  
29  
30  
31  
32  
33  
34  
35  
36  
37  
38  
39  
40  
41  
42  
43  
44  
45  
46  
47  
48  
49  
50  
51  
52  
53  
54  
55  
56  
57  
58  
59  
60

|                            |                                     |
|----------------------------|-------------------------------------|
| Secondary Subject Heading: | Neurology                           |
| Keywords:                  | PARKINSON'S DISEASE, DYSPHAGIA, PET |
|                            |                                     |

SCHOLARONE™  
Manuscripts

For peer review only

# Hypometabolism in the supplementary and anterior cingulate cortices is related to dysphagia in Parkinson's disease: a cross-sectional and 3-year longitudinal cohort study

Akio Kikuchi,<sup>1</sup> Toru Baba,<sup>1</sup> Takafumi Hasegawa,<sup>1</sup> Michiko Kobayashi,<sup>1,2</sup> Naoto Sugeno,<sup>1</sup> Masatoshi Konno,<sup>1</sup> Emiko Miura,<sup>1</sup> Yoshiyuki Hosokai,<sup>3</sup> Toshiyuki Ishioka,<sup>3,4</sup> Yoshiyuki Nishio,<sup>3</sup> Kazumi Hirayama,<sup>3,5</sup> Kyoko Suzuki,<sup>3,6</sup> Masashi Aoki,<sup>1</sup> Shoki Takahashi,<sup>7</sup> Hiroshi Fukuda,<sup>8</sup> Yasuto Itoyama,<sup>1,9</sup> Etsuro Mori,<sup>3</sup> Atsushi Takeda<sup>1</sup>

<sup>1</sup> Department of Neurology, Tohoku University Graduate School of Medicine, Sendai, Japan

<sup>2</sup> Department of Neurology, Tohoku Employees' Pension Welfare Hospital, Sendai, Japan.

<sup>3</sup> Department of Behavioral Neurology and Cognitive Neuroscience, Tohoku University Graduate School of Medicine, Sendai, Japan

<sup>4</sup> Department of Occupational Therapy, School of Health and Social Services, Saitama Prefectural University, Saitama, Japan

<sup>5</sup> Department of Occupational Therapy, Yamagata Prefectural University of Health Sciences, Yamagata, Japan

<sup>6</sup> Department of Clinical Neuroscience, Yamagata University Graduate School of Medicine, Yamagata, Japan

<sup>7</sup> Department of Diagnostic Radiology, Tohoku University Graduate School of Medicine, Sendai, Japan

<sup>8</sup> Department of Nuclear Medicine and Radiology, Institute of Development, Aging and Cancer, Tohoku University, Sendai, Japan

<sup>9</sup> National Center Hospital, National Center of Neurology and Psychiatry (NCNP), Tokyo, Japan

Corresponding Author: Atsushi Takeda, M.D.

Department of Neurology, Tohoku University Graduate School of Medicine

1-1 Seiryomachi, Aoba-ku, Sendai, Miyagi, 980-8574, Japan

Phone: +81-22-717-7189 Fax: +81-22-717-7192

E-mail: atakeda@med.tohoku.ac.jp

**Text word count:** 2201

**Abstract word count:** 261

**Number of references:** 40

**Number of tables:** 1

**Number of figures:** 4

**ABSTRACT**

**Background:** Dysphagia is one of the cardinal symptoms of Parkinson's disease (PD) and is closely related to the quality of life and longevity of PD patients.

**Objective:** To study the pathophysiological mechanisms responsible for dysphagia in PD.

**Design:** A cross-sectional and longitudinal comparative study.

**Setting:** Tohoku university hospital.

**Participants:** Eight patients with dysphagia, 15 patients without dysphagia and 10 normal control subjects.

**Main Outcome Measures:** The time needed for swallowing initiation and changes in brain glucose metabolism at baseline and after a 3-year follow-up period.

**Results:** The time needed for swallowing initiation was significantly longer in the patients with dysphagia compared with the patients without dysphagia at baseline and after the 3-year follow-up period ( $p < 0.05$ ). The patients with dysphagia exhibited hypometabolism in the supplementary motor area (SMA) and anterior cingulate cortex (ACC) compared with the 10 normal control subjects at baseline (uncorrected  $p < 0.001$ ). After the 3-year follow-up period, the number of brain areas showing hypometabolism increased, involving not only the SMA and the ACC but also the bilateral medial frontal lobes, middle cingulate cortex, thalamus and right superior, middle, inferior and orbital frontal gyri (uncorrected  $p < 0.001$ ). In contrast, the patients without dysphagia showed virtually no regional hypometabolism at baseline (uncorrected  $p < 0.001$ ) and only a small degree of hypometabolism in the SMA and ACC after the 3-year follow-up period (uncorrected  $p < 0.001$ ).

**Conclusions:** These results suggest that dysphagia in PD patients is mainly related to a difficulty in swallowing initiation that is based on a combination of poor movement planning due to SMA dysfunction and impaired cognitive processing due to ACC dysfunction.

## ARTICLE SUMMARY

### Article focus

- Cortical hypometabolism associated with dysphagia in PD were statistically examined at baseline and after a 3-year follow-up period.

### Key messages

- The multiple cortical impairments, mainly in the SMA and ACC, might be responsible for the dysphagia in PD.
- The time needed for swallowing initiation was significantly longer in the patients with dysphagia.
- Dysphagia in PD patients is mainly related to a difficulty in swallowing initiation that is based on a combination of poor movement planning due to SMA dysfunction and impaired cognitive processing due to ACC dysfunction.

### Strengths and limitations of this study

- Strength: this study is the first to statistically examine the associations between cortical hypometabolism and dysphagia in PD patients as a cross-sectional and longitudinal comparative study.
- Limitation: the findings may not be related to dysphagia alone because  $^{18}\text{F}$ -fluorodeoxyglucose-PET cannot be used for a dynamic scanning during swallowing. Weakness: the absence of videofluoroscopy as swallowing evaluation.

## INTRODUCTION

Parkinson's disease (PD) is primarily characterized by motor dysfunctions, some of which, such as tremor, rigidity, and bradykinesia, respond well to dopamine replacement therapy, whereas others, such as postural instability, dysarthria, and dysphagia, remain intractable and often impair quality of life in advanced cases. The involvement of non-dopaminergic systems is implied in such dopamine-refractory symptoms; however, the detailed pathophysiological mechanisms of these systems are still elusive. In particular, dysphagia is directly associated with malnutrition and difficulty in drug taking; moreover, this symptom sometimes results in aspiration pneumonia, the main cause of death in PD patients.<sup>1-3</sup> The voluntary transport of food through the oral cavity, pharynx, and esophagus to the stomach requires sequential motor events. Deglutition occurs through five consecutive phases: anticipatory (cognitive), preparatory (masticatory), oral, pharyngeal, and esophageal. Dysphagia is associated with all of these stages.<sup>4-8</sup>

In general, dysphagia in PD is thought to reflect impaired function of the medullary swallowing center. The involvement of higher central nervous system areas is also implied, but remains to be elucidated. In the present study, we investigated the swallowing functions of PD patients and compared them with changes in cortical metabolism using <sup>18</sup>F-fluorodeoxyglucose (FDG)-PET. Moreover, we investigated clinical and imaging data not only at baseline, but also after a 3-year follow-up period, making this research a longitudinal study.

## METHODS

## Participants

All of the 43 PD patients were diagnosed based on the United Kingdom PD Brain Bank criteria for idiopathic PD.<sup>9</sup> The extent of dementia was evaluated in all of the subjects, using the clinical dementia rating (CDR). PD patients with a CDR score greater than 0.5 were excluded to minimize artifacts related to cognitive impairment. We defined a score of 0 as no dysphagia and a score of >1 as dysphagia, according to Part II of the unified Parkinson's disease rating scale (UPDRS). The UPDRS total scores, mini-mental state examination (MMSE), and PET studies were evaluated during the "on" state, i.e., with the administration of anti-parkinsonian drugs. Ten age-matched control subjects (4 women and 6 men; mean age 64.4±4.12 years; mean MMSE score 28.7±1.49) were collected to compare with PD patients with and without dysphagia for PET analysis. All of the procedures were approved by the Ethical Committee of Tohoku University Graduate School of Medicine. Written informed consent was obtained from each subject after a full explanation of the entire 3-year longitudinal study.

## PET procedure

All of the subjects fasted for at least 5 hours prior to PET scanning. PET scans were acquired 60 minutes after intravenous injection of 185-218 MBq FDG. Dynamic PET scans were taken in three-dimensional mode using a Biograph<sup>TM</sup> Duo PET scanner (Siemens Medical Systems, Inc., Iselin, NJ, USA). To minimize the effects of external stimuli during the FDG uptake period, the subjects stayed in a quiet room wearing an eye mask. The in-plane and axial resolutions of the scanner were 3.38 mm and 3.38

1  
2  
3 mm, respectively. Attenuation correction was performed with a computed tomography  
4  
5 scan. Image reconstructions were performed using ordered subset expectation  
6  
7 maximization algorithms (16 subsets x 6 iterations) using a Gaussian filter with  
8  
9 full-width at half-maximum = 2.0 mm in a 256 x 256 matrix, with a pixel size of 1.33  
10  
11 x 1.33 mm and a slice thickness of 2.0 mm. The FDG-PET scans acquired at the  
12  
13 follow-up were performed in an identical manner.  
14  
15  
16  
17  
18  
19

### 20 **Data analysis**

21  
22 Statistical parametric mapping (SPM) was used for group comparisons of PET images.  
23  
24 First, all of the PET images were spatially normalized with linear and nonlinear  
25  
26 parameters using SPM2 software (Wellcome Department of Imaging Neuroscience,  
27  
28 London, UK) implemented in MATLAB® (The MathWorks, Inc., Sherborn, MA,  
29  
30 USA). A three-dimensional Gaussian filter of 10 mm was used to smooth each image.  
31  
32 Next, the regional metabolic abnormalities in the PD patients with and without  
33  
34 dysphagia at baseline and after the 3-year follow-up period were estimated by  
35  
36 comparison with 10 age-matched control subjects using proportional scaling. The  
37  
38 statistical threshold was  $p < 0.001$  (uncorrected) with an extent threshold of 40 voxels.  
39  
40  
41  
42  
43  
44  
45

### 46 **Evaluation of swallowing**

47  
48 We evaluated the time needed for swallowing initiation and the 30-second swallowing  
49  
50 frequency. The index and ring finger pads of the investigator were placed on the  
51  
52 thyroid cartilage and laryngeal prominence. The time needed for swallowing initiation  
53  
54 was defined as the time until movement of the thyroid cartilage and laryngeal  
55  
56  
57  
58  
59  
60



1  
2  
3 prominence following the guidance cue to begin swallowing. The time of swallowing  
4  
5 initiation across three trials was averaged. We also measured the swallowing  
6  
7 frequency by asking the patients to swallow as many times as possible in 30 seconds  
8  
9 and counting the movements of the thyroid cartilage and laryngeal prominence.<sup>10, 11</sup>  
10  
11

12 The patient profiles were statistically analyzed using two-sample t-tests. For the  
13  
14 swallowing function, the within-group differences of the patients with and without  
15  
16 dysphagia were assessed using paired t-tests.  
17  
18  
19

## 20 21 22 **RESULTS**

23  
24 Of the 43 potentially eligible cases, 16 were excluded from the analysis because of  
25  
26 dementia. The 27 patients who fulfilled the above entry criteria included 9 patients  
27  
28 with dysphagia and 18 patients without dysphagia. The mean ( $\pm$ standard deviation)  
29  
30 age was  $68.2 \pm 3.23$  years in the patients with dysphagia and  $65.8 \pm 3.94$  years in the  
31  
32 patients without dysphagia. All of the patients were right-handed. Eight of 9 PD  
33  
34 patients with dysphagia and 15 of 18 without dysphagia at baseline participated in the  
35  
36 3-year follow-up study. The details of the excluded patients were as follows: 2 patients  
37  
38 without dysphagia went to other hospitals, and 1 patient without dysphagia and 1  
39  
40 patient with dysphagia were unable to be evaluated during the follow-up period  
41  
42 because of the introduction of a feeding tube (figure 1).  
43  
44  
45  
46  
47

48 Clinical features and medications were summarized in table 1. No significant  
49  
50 differences were found in the age, Hoehn-Yahr stage, dosage of anti-parkinsonian  
51  
52 agents, including L-dopa (table 1), or 30-second swallowing frequency (figure 2B),  
53  
54 but significant differences were found between the two groups in disease duration,  
55  
56  
57  
58  
59  
60

1  
2  
3 UPDRS motor score, and time needed for swallowing initiation at baseline ( $p < 0.05$ ,  
4 table 1, figure 2A). After the 3-year follow-up period, the differences in the time  
5 needed for swallowing initiation were still clear, but no significant differences became  
6 evident in the UPDRS motor scores (table 1, figure 2A). Significant differences were  
7 revealed in the swallowing frequency within 30 seconds between the two groups  
8 ( $p < 0.05$ , table 1, figure 2B).

9  
10  
11  
12  
13  
14  
15  
16  
17  
18 A comparison of the regional cerebral glucose of PD patients with that of normal  
19 controls demonstrated hypometabolism in the supplementary motor area (SMA) and  
20 the anterior cingulate cortex (ACC) in the patients with dysphagia at baseline  
21 (uncorrected  $p < 0.001$ , figure 3A). These metabolic changes showed no significant  
22 correlations with the severity of the Hoehn-Yahr stages (uncorrected  $p < 0.001$ , data not  
23 shown) or the UPDRS motor scores (uncorrected  $p < 0.001$ , data not shown).  
24  
25  
26  
27  
28  
29  
30  
31  
32 Furthermore, no regional hypermetabolism was found in the PD patients with  
33 dysphagia compared with the normal control subjects (uncorrected  $p < 0.001$ , data not  
34 shown). Additionally, no relationships were observed between the changes in the  
35 regional cerebral glucose metabolism and the doses of anti-parkinsonian agents,  
36 including L-dopa ( $p > 0.05$ , data not shown). After the 3-year follow-up period, the  
37 areas of hypometabolism included not only the SMA and the ACC but also the  
38 bilateral medial frontal lobes, middle cingulate cortex, thalamus and right superior,  
39 middle, inferior and orbital frontal gyri (uncorrected  $p < 0.001$ , figure 3B). In contrast,  
40 PD patients without dysphagia showed virtually no regional hypometabolism at  
41 baseline (uncorrected  $p < 0.001$ , figure 4A) and only a small degree of hypometabolism  
42 in the SMA and the ACC after the 3-year follow-up period (uncorrected  $p < 0.001$ ,  
43  
44  
45  
46  
47  
48  
49  
50  
51  
52  
53  
54  
55  
56  
57  
58  
59  
60

1  
2  
3 figure 4B) compared with normal controls.  
4  
5  
6

## 7 8 **DISCUSSION**

9  
10 The present results suggested that, although several motor cortical areas control  
11 deglutition, multiple cortical impairments, mainly in the SMA and ACC, might be  
12 responsible for the dysphagia in PD. These results were in agreement with the findings  
13 of previous activation studies of normal deglutition.<sup>12-19</sup> Impairments in these areas  
14 did not appear to be closely associated with the degree of general motor dysfunction  
15 and cognitive impairments, as no significant correlations were found between the  
16 UPDRS motor scores or the MMSE scores and the degree of hypometabolism in these  
17 areas (uncorrected  $p < 0.001$ , data not shown). Moreover, although there were no  
18 significant changes in the UPDRS motor scores and the MMSE scores between  
19 baseline and 3-year follow-up (table 1), cortical hypometabolism in the medial frontal  
20 lobes was markedly extended, especially in the cases with dysphagia (figure 3).  
21 Interestingly, in the patients with dysphagia, both of the swallowing indices showed  
22 tendencies toward exacerbation during the 3-year follow-up period, although the  
23 differences were not significant (figure 2).  
24  
25  
26  
27  
28  
29  
30  
31  
32  
33  
34  
35  
36  
37  
38  
39  
40  
41  
42

43  
44 Major subcortical inputs to the SMA via the thalamus arise from the globus  
45 pallidus and the substantia nigra.<sup>20</sup> The SMA also receives limbic inputs from the  
46 cingulate cortex.<sup>21</sup> The SMA is known to be important in mediating and preparing  
47 complex sequences of movement<sup>22</sup> and in movement planning and execution.<sup>23-27</sup> PET  
48 and functional magnetic resonance imaging studies demonstrated SMA activation  
49 during the swallowing task.<sup>12, 28</sup> Activation of the SMA preceding the onset of  
50  
51  
52  
53  
54  
55  
56  
57  
58  
59  
60

1  
2  
3 volitional swallowing can also be demonstrated by the assessment of the  
4  
5 Bereitschaftspotential, one of the premotor potentials that is considered to reflect the  
6  
7 activities of the SMA.<sup>29</sup> The amplitude of the Bereitschaftspotential<sup>30</sup> was shown to be  
8  
9 significantly lower in PD patients compared with age-matched controls.<sup>31</sup> PET and  
10  
11 single-photon emission computed tomography studies also demonstrated dysfunction  
12  
13 of the SMA in PD.<sup>32-36</sup> Therefore, the SMA dysfunction in PD patients with dysphagia  
14  
15 is likely to be related to the impaired volitional initiation of swallowing.  
16  
17  
18

19  
20 The ACC is connected to both the insula<sup>37</sup> and the amygdale,<sup>38</sup> which are  
21  
22 implicated in autonomic function and somato- and viscerosensory input. Intense  
23  
24 stimulation of the esophagus<sup>8,39</sup> and changes in gastrointestinal motility<sup>38</sup> were shown  
25  
26 to activate the ACC. The ACC is thought to play an important role in receiving  
27  
28 sensory stimuli from the alimentary tract. The functions of the rostral ACC are  
29  
30 autonomic regulation and visceromotor control.<sup>14</sup> In fact, the rostral ACC is activated  
31  
32 during automatic swallowing.<sup>14</sup> In contrast, the more dorsal and caudal regions of the  
33  
34 ACC function in skeletomotor control, including movement regulation and premotor  
35  
36 function, response selection, attention to willed action, and nociception.<sup>25</sup> The  
37  
38 intermediate and caudal regions of the ACC are activated during voluntary  
39  
40 swallowing.<sup>14, 19, 40</sup> As PD patients with dysphagia showed hypometabolism in the  
41  
42 intermediate and caudal regions of the ACC, corresponding to Brodmann's area 24 as  
43  
44 shown in figure 3A, the dysphagia in PD patients appears to be associated with  
45  
46 difficulties in the processing of voluntary swallowing. In fact, the mean time needed  
47  
48 to initiate swallowing was longer in cases with dysphagia (figure 2).  
49  
50  
51  
52  
53  
54

55  
56 In this study, the time needed for swallowing initiation, which shows high  
57  
58  
59  
60

1  
2  
3 repeatability and reflects the time from the anticipatory to the pharyngeal stages of  
4  
5 deglutition, was measured, but other stages were not evaluated. Additional evaluation,  
6  
7 such as videofluoroscopy, is needed to understand the relationship between brain  
8  
9 hypometabolism and dysphagia in PD patients. Interestingly, in 4 of 8 patients with  
10  
11 dysphagia, the time needed for swallowing initiation was above average (2.35 sec),  
12  
13 and, in fact, percutaneous endoscopic gastrostomies were performed in 2 of these 4  
14  
15 patients within 4 years of the baseline study. Thus, by measuring the time needed for  
16  
17 swallowing initiation, we may be able to predict the long-term prognosis of dysphagia.  
18  
19  
20  
21  
22  
23

## 24 CONCLUSION

25  
26  
27 In conclusion, the data presented in this study suggested that dysphagia in PD patients  
28  
29 was related to dysfunctions in the SMA and the ACC, resulting in poor movement  
30  
31 planning of voluntary swallowing. The results also implied that training exercises,  
32  
33 possibly involving tongue movements, may activate broader cortical areas, including  
34  
35 the SMA and ACC,<sup>17</sup> and may be useful in dysphagia rehabilitation.  
36  
37  
38  
39  
40

41 **Contributors:** Conception and design: Akio Kikuchi, Atsushi Takeda. Analysis and  
42  
43 interpretation of the data: Akio Kikuchi, Toru Baba, Atsushi Takeda. Drafting of the article:  
44  
45 Akio Kikuchi, Atsushi Takeda. Collection and assembly of data: All authors.

46 **Funding:** This study was supported by a grant for a Symposium on Catecholamine and  
47  
48 Neurological Disorders and a Grant-in-Aid for Scientific Research (C) (23591266) from The  
49  
50 Ministry of Education, Culture, Sports, Science and Technology (MEXT), Japan. The funders  
51  
52 had no role in study design, data collection and analysis, decision to publish, or preparation of  
53  
54 the manuscript.

55 **Competing interests:** None.

56 **Patient consent:** Standardised patient consent forms were signed by all patients and controls.

57  
58 **Ethics approval:** Ethics approval was provided by the Ethical Committee of Tohoku  
59  
60

1  
2  
3  
4  
5  
6  
7  
8  
9  
10  
11  
12  
13  
14  
15  
16  
17  
18  
19  
20  
21  
22  
23  
24  
25  
26  
27  
28  
29  
30  
31  
32  
33  
34  
35  
36  
37  
38  
39  
40  
41  
42  
43  
44  
45  
46  
47  
48  
49  
50  
51  
52  
53  
54  
55  
56  
57  
58  
59  
60

University Graduate School of Medicine.

**Provenance and peer review:** Not commissioned; externally peer reviewed.

**Data sharing statement:** No additional data are available.

For peer review only

## REFERENCES

1. Nakashima K, Maeda M, Tabata M, et al. Prognosis of Parkinson's disease in Japan. Tottori University Parkinson's Disease Epidemiology (TUPDE) Study Group. *Eur Neurol* 1997;38 Suppl 2:60-3.
2. Hely MA, Morris JG, Traficante R, et al. The Sydney multicentre study of Parkinson's disease: progression and mortality at 10 years. *J Neurol Neurosurg Psychiatry* 1999;67:300-7.
3. Fall PA, Saleh A, Fredrickson M, et al. Survival time, mortality, and cause of death in elderly patients with Parkinson's disease: a 9-year follow-up. *Mov Disord* 2003;18:1312-6.
4. Bushmann M, Dobbmeyer SM, Lecker L, et al. Swallowing abnormalities and their response to treatment in Parkinson's disease. *Neurology* 1989;39:1309-14.
5. Bird MR, Woodward MC, Gibson EM, et al. Asymptomatic swallowing disorders in elderly patients with Parkinson's disease: a description of findings on clinical examination and videofluoroscopy in sixteen patients. *Age Ageing* 1994;23:251-4.
6. Leopold NA, Kagel MC. Prepharyngeal dysphagia in Parkinson's disease. *Dysphagia* 1996;11:14-22.
7. Leopold NA, Kagel MC. Pharyngo-esophageal dysphagia in Parkinson's disease. *Dysphagia* 1997;12:11-8; discussion 9-20.
8. Aziz Q, Andersson JL, Valind S, et al. Identification of human brain loci processing esophageal sensation using positron emission tomography. *Gastroenterology* 1997;113:50-9.
9. Gibb WR, Lees AJ. The relevance of the Lewy body to the pathogenesis of idiopathic Parkinson's disease. *J Neurol Neurosurg Psychiatry* 1988;51:745-52.
10. Oguchi K, Saitoh E, Mizuno M, et al. The repetitive saliva swallowing test (RSST) as a screening test of functional dysphagia (1) normal values of RSST. *Jpn J Rehabil Med* 2000;37:375-82.
11. Tamura F, Mizukami M, Ayano R, et al. Analysis of feeding function and jaw stability in bedridden elderly. *Dysphagia* 2002;17:235-41.
12. Hamdy S, Rothwell JC, Brooks DJ, et al. Identification of the cerebral loci processing human swallowing with H2(15)O PET activation. *J Neurophysiol* 1999;81:1917-26.
13. Kern MK, Jaradeh S, Arndorfer RC, et al. Cerebral cortical representation of reflexive and volitional swallowing in humans. *Am J Physiol Gastrointest Liver Physiol* 2001;280:G354-60.
14. Martin RE, Goodyear BG, Gati JS, et al. Cerebral cortical representation of automatic and volitional swallowing in humans. *J Neurophysiol* 2001;85:938-50.
15. Martin R, Barr A, MacIntosh B, et al. Cerebral cortical processing of swallowing in older adults. *Exp Brain Res* 2007;176:12-22.
16. Mosier K, Bereznaya I. Parallel cortical networks for volitional control of swallowing in humans. *Exp Brain Res* 2001;140:280-9.
17. Martin RE, MacIntosh BJ, Smith RC, et al. Cerebral areas processing swallowing and tongue movement are overlapping but distinct: a functional magnetic resonance imaging study. *J Neurophysiol* 2004;92:2428-43.
18. Harris ML, Julyan P, Kulkarni B, et al. Mapping metabolic brain activation during human volitional swallowing: a positron emission tomography study using [18F]fluorodeoxyglucose. *J Cereb Blood Flow Metab* 2005;25:520-6.
19. Toogood JA, Barr AM, Stevens TK, et al. Discrete functional contributions of cerebral cortical foci in voluntary swallowing: a functional magnetic resonance imaging (fMRI) "Go, No-Go" study. *Exp Brain Res* 2005;161:81-90.

- 1
  - 2
  - 3
  - 4
  - 5
  - 6
  - 7
  - 8
  - 9
  - 10
  - 11
  - 12
  - 13
  - 14
  - 15
  - 16
  - 17
  - 18
  - 19
  - 20
  - 21
  - 22
  - 23
  - 24
  - 25
  - 26
  - 27
  - 28
  - 29
  - 30
  - 31
  - 32
  - 33
  - 34
  - 35
  - 36
  - 37
  - 38
  - 39
  - 40
  - 41
  - 42
  - 43
  - 44
  - 45
  - 46
  - 47
  - 48
  - 49
  - 50
  - 51
  - 52
  - 53
  - 54
  - 55
  - 56
  - 57
  - 58
  - 59
  - 60
20. Hoover JE, Strick PL. Multiple output channels in the basal ganglia. *Science* 1993;259:819-21.
21. Tanji J. The supplementary motor area in the cerebral cortex. *Neurosci Res* 1994;19:251-68.
22. Fried I, Katz A, McCarthy G, et al. Functional organization of human supplementary motor cortex studied by electrical stimulation. *J Neurosci* 1991;11:3656-66.
23. Dum RP, Strick PL. The origin of corticospinal projections from the premotor areas in the frontal lobe. *J Neurosci* 1991;11:667-89.
24. Dum RP, Strick PL. Motor areas in the frontal lobe of the primate. *Physiol Behav* 2002;77:677-82.
25. Devinsky O, Morrell MJ, Vogt BA. Contributions of anterior cingulate cortex to behaviour. *Brain* 1995;118 (Pt 1):279-306.
26. Deiber MP, Ibanez V, Sadato N, et al. Cerebral structures participating in motor preparation in humans: a positron emission tomography study. *J Neurophysiol* 1996;75:233-47.
27. Richter W, Andersen PM, Georgopoulos AP, et al. Sequential activity in human motor areas during a delayed cued finger movement task studied by time-resolved fMRI. *Neuroreport* 1997;8:1257-61.
28. Mosier K, Patel R, Liu WC, et al. Cortical representation of swallowing in normal adults: functional implications. *Laryngoscope* 1999;109:1417-23.
29. Huckabee ML, Deecke L, Cannito MP, et al. Cortical control mechanisms in volitional swallowing: the Bereitschaftspotential. *Brain Topogr* 2003;16:3-17.
30. Kornhuber HH, Deecke L. [Changes In The Brain Potential In Voluntary Movements And Passive Movements In Man: Readiness Potential And Reafferent Potentials.]. *Pflugers Arch Gesamte Physiol Menschen Tiere* 1965;284:1-17.
31. Dick JP, Rothwell JC, Day BL, et al. The Bereitschaftspotential is abnormal in Parkinson's disease. *Brain* 1989;112 (Pt 1):233-44.
32. Playford ED, Jenkins IH, Passingham RE, et al. Impaired mesial frontal and putamen activation in Parkinson's disease: a positron emission tomography study. *Ann Neurol* 1992;32:151-61.
33. Grafton ST, Waters C, Sutton J, et al. Pallidotomy increases activity of motor association cortex in Parkinson's disease: a positron emission tomographic study. *Ann Neurol* 1995;37:776-83.
34. Jahanshahi M, Jenkins IH, Brown RG, et al. Self-initiated versus externally triggered movements. I. An investigation using measurement of regional cerebral blood flow with PET and movement-related potentials in normal and Parkinson's disease subjects. *Brain* 1995;118 (Pt 4):913-33.
35. Brooks DJ. PET and SPECT studies in Parkinson's disease. *Baillieres Clin Neurol* 1997;6:69-87.
36. Kikuchi A, Takeda A, Kimpara T, et al. Hypoperfusion in the supplementary motor area, dorsolateral prefrontal cortex and insular cortex in Parkinson's disease. *J Neurol Sci* 2001;193:29-36.
37. Mesulam MM, Mufson EJ. Insula of the old world monkey. III: Efferent cortical output and comments on function. *J Comp Neurol* 1982;212:38-52.
38. Pandya DN, Van Hoesen GW, Domesick VB. A cingulo-amygdaloid projection in the rhesus monkey. *Brain Res* 1973;61:369-73.
39. Kern MK, Birn RM, Jaradeh S, et al. Identification and characterization of cerebral cortical response to esophageal mucosal acid exposure and distention. *Gastroenterology* 1998;115:1353-62.
40. Paus T, Otaky N, Caramanos Z, et al. In vivo morphometry of the intrasulcal gray matter



1  
2  
3 in the human cingulate, paracingulate, and superior-rostral sulci: hemispheric  
4 asymmetries, gender differences and probability maps. J Comp Neurol 1996;376:664-73.  
5  
6  
7  
8  
9  
10  
11  
12  
13  
14  
15  
16  
17  
18  
19  
20  
21  
22  
23  
24  
25  
26  
27  
28  
29  
30  
31  
32  
33  
34  
35  
36  
37  
38  
39  
40  
41  
42  
43  
44  
45  
46  
47  
48  
49  
50  
51  
52  
53  
54  
55  
56  
57  
58  
59  
60

For peer review only

**Table 1** Profiles of PD patients

| Parameters                      | Baseline       |                   | Follow-up      |                   |
|---------------------------------|----------------|-------------------|----------------|-------------------|
|                                 | With dysphagia | Without dysphagia | With dysphagia | Without dysphagia |
| Number of patients              | 8              | 15                |                |                   |
| Sex (M / W)                     | 6/ 2           | 4 /11             |                |                   |
| Age (yrs)                       |                |                   |                |                   |
| Mean                            | 67.8±3.11      | 65.2±4.02         |                |                   |
| Range                           | 63-71          | 60-74             |                |                   |
| Disease duration (yrs)          | 6.75±3.73*     | 3.53±3.58         |                |                   |
| MMSE                            | 28.5±1.93      | 28.5±1.51         | 27.9±2.80      | 28.4±1.60         |
| Hoehn-Yahr stage                | 2.75±0.27      | 2.37±0.67         | 3.06±0.42      | 2.93±0.53         |
| UPDRS motor score               | 23.4±7.05*     | 14.8±7.49         | 21.0±5.93      | 17.4±11.1         |
| L-dopa equivalent dose (mg/day) | 400±311        | 267±321           | 590±155        | 514±311           |

Values are mean±standard deviation or number of patients.

\*Significant difference  $p < 0.05$  between with dysphagia and without dysphagia.

PD=Parkinson's disease; M=men; W=women; MMSE=Mini Mental State Examination;

UPDRS=unified Parkinson's disease rating scale

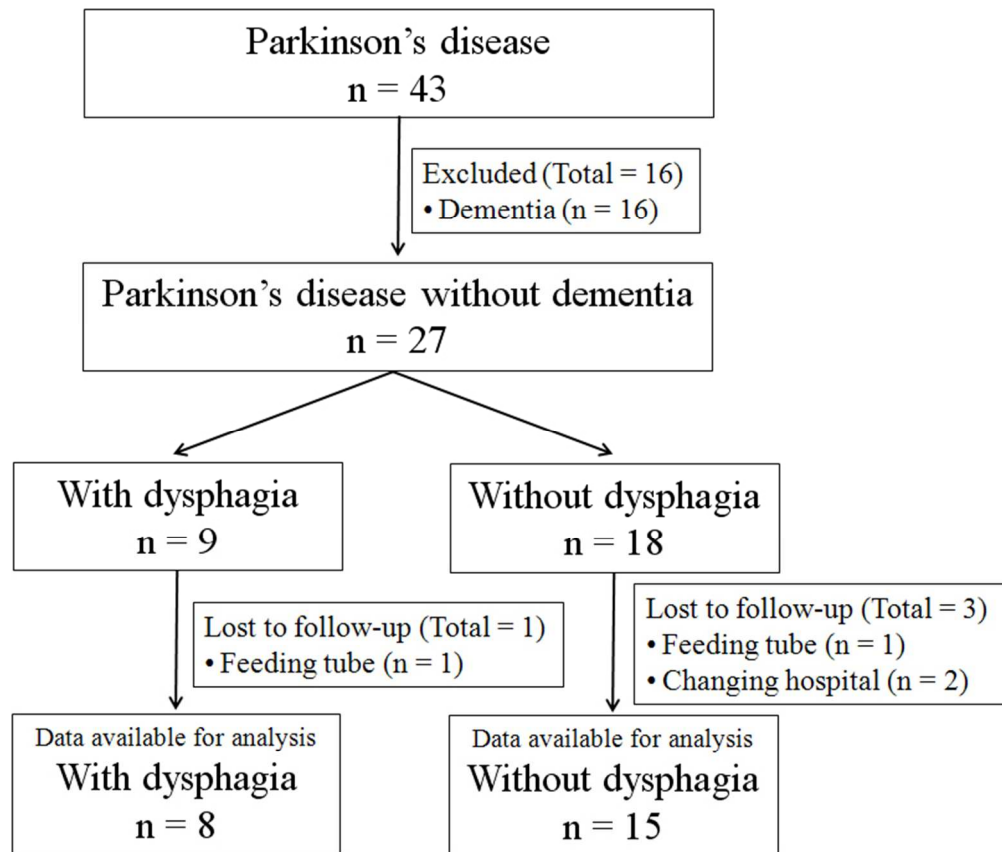

**PD patients and follow-up flow diagram.**  
284x243mm (72 x 72 DPI)

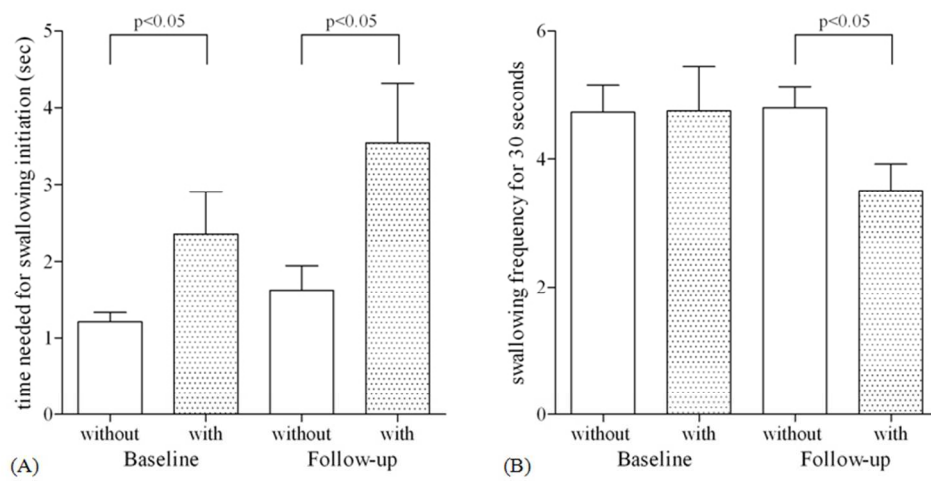

**The time needed for swallowing initiation and the 30-second swallowing frequency in PD patients with and without dysphagia at baseline and after a 3-year follow-up period.**

There were significant differences between PD patients with and without dysphagia in the time needed for swallowing initiation at baseline and after a 3-year follow-up period ( $p<0.05$ ) (A). In the 30-second swallowing frequency, there was no significant difference between the PD patients with and without dysphagia at baseline ( $p>0.05$ ), but a significant difference between the two groups was evident after the 3-year follow-up period ( $p<0.05$ ) (B).

322x162mm (72 x 72 DPI)

## With dysphagia

Baseline

Follow-up

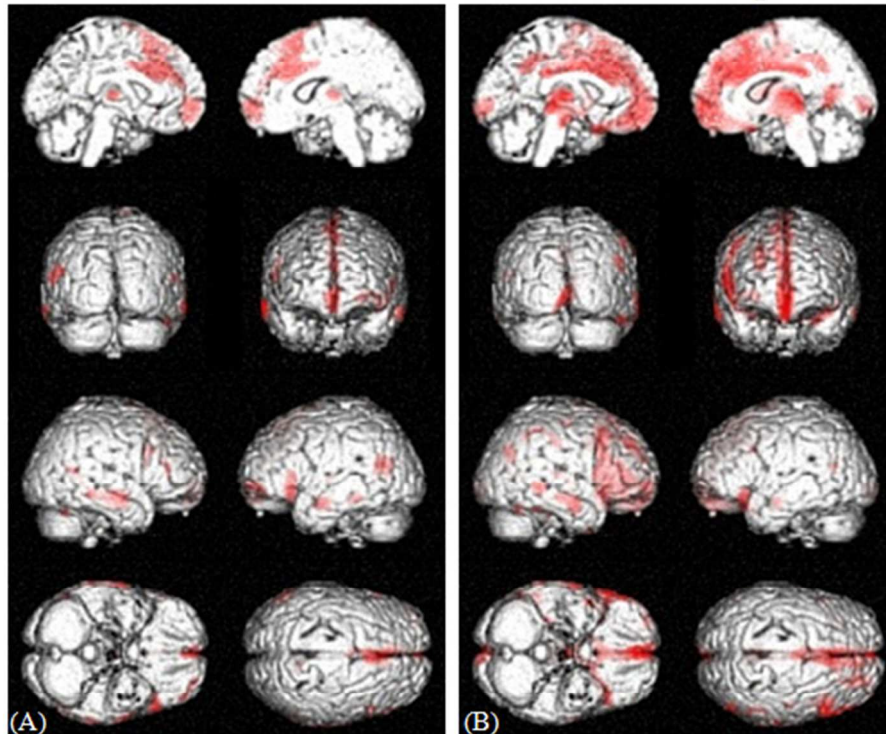uncorrected  $p < 0.001$ ,  $k = 40$ uncorrected  $p < 0.001$ ,  $k = 40$ 

**Cross-sectional analyses of brain maps showing the differences between PD patients with dysphagia and normal control subjects at baseline (A) and after a 3-year follow-up period (B).**

Various areas showed differences in the standardized PET data, and areas with a height threshold of  $p < 0.001$  (uncorrected) and an extent threshold of 40 voxels are illustrated. A comparison of regional cerebral glucose metabolism values demonstrated hypometabolism in the SMA and ACC in the PD patients with dysphagia compared with normal control subjects at baseline (uncorrected  $p < 0.001$ , threshold=40 voxels) (A). After the 3-year follow-up period, the areas of hypometabolism included not only the SMA and the ACC but also the bilateral medial frontal lobes, middle cingulate cortex, thalamus and right superior, middle, inferior, and orbital frontal gyri (uncorrected  $p < 0.001$ , threshold=40 voxels) (B).

212x201mm (72 x 72 DPI)

## Without dysphagia

Baseline

Follow-up

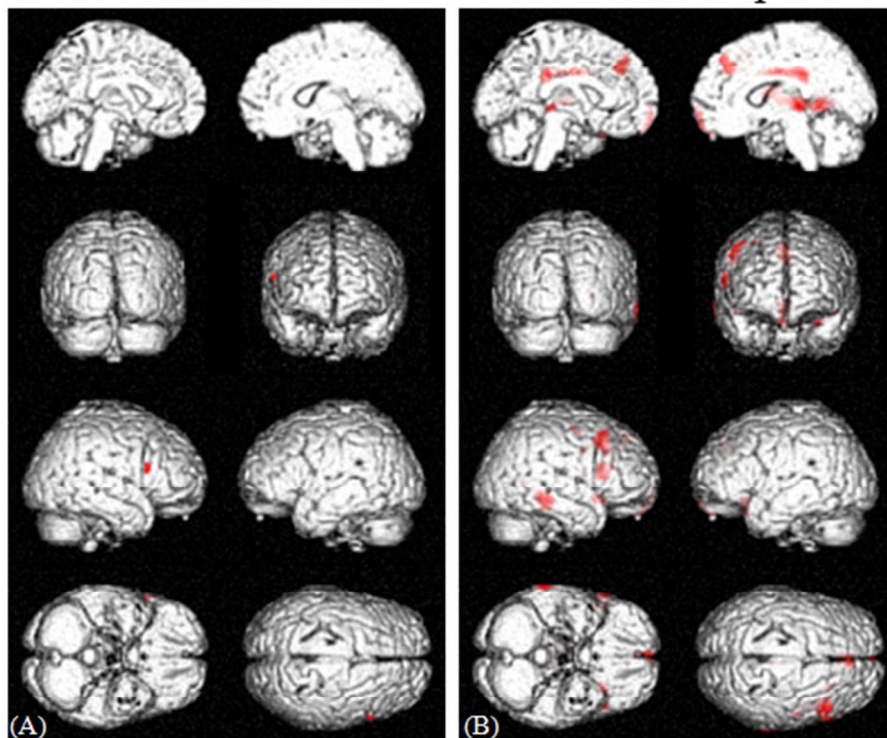uncorrected  $p < 0.001$ ,  $k = 40$ uncorrected  $p < 0.001$ ,  $k = 40$ 

**Cross-sectional analyses of brain maps showing differences between PD patients without dysphagia and normal control subjects at baseline (A) and after a 3-year follow-up period (B).**

Various areas showed differences in the standardized PET data, and areas with a height threshold of  $p < 0.001$  (uncorrected) and an extent threshold of 40 voxels are illustrated. The PD patients without dysphagia showed virtually no hypometabolism at baseline (uncorrected  $p < 0.001$ , threshold=40 voxels) (A) and only a small degree of hypometabolism in the SMA and ACC after the 3-year follow-up period (uncorrected  $p < 0.001$ , threshold=40 voxels) (B) compared with normal control subjects. 212x201mm (72 x 72 DPI)

**STROBE 2007 (v4) checklist of items to be included in reports of observational studies in epidemiology\***  
**Checklist for cohort, case-control, and cross-sectional studies (combined)**

| Section/Topic             | Item # | Recommendation                                                                                                                                                                                                                                                                                                                                                                                                                                                         | Reported on page # |
|---------------------------|--------|------------------------------------------------------------------------------------------------------------------------------------------------------------------------------------------------------------------------------------------------------------------------------------------------------------------------------------------------------------------------------------------------------------------------------------------------------------------------|--------------------|
| Title and abstract        | 1      | (a) Indicate the study's design with a commonly used term in the title or the abstract                                                                                                                                                                                                                                                                                                                                                                                 | 1-2                |
|                           |        | (b) Provide in the abstract an informative and balanced summary of what was done and what was found                                                                                                                                                                                                                                                                                                                                                                    | 2                  |
| <b>Introduction</b>       |        |                                                                                                                                                                                                                                                                                                                                                                                                                                                                        |                    |
| Background/rationale      | 2      | Explain the scientific background and rationale for the investigation being reported                                                                                                                                                                                                                                                                                                                                                                                   | 4                  |
| Objectives                | 3      | State specific objectives, including any pre-specified hypotheses                                                                                                                                                                                                                                                                                                                                                                                                      | 4                  |
| <b>Methods</b>            |        |                                                                                                                                                                                                                                                                                                                                                                                                                                                                        |                    |
| Study design              | 4      | Present key elements of study design early in the paper                                                                                                                                                                                                                                                                                                                                                                                                                | 5                  |
| Setting                   | 5      | Describe the setting, locations, and relevant dates, including periods of recruitment, exposure, follow-up, and data collection                                                                                                                                                                                                                                                                                                                                        | 5                  |
| Participants              | 6      | (a) <i>Cohort study</i> —Give the eligibility criteria, and the sources and methods of selection of participants. Describe methods of follow-up<br><i>Case-control study</i> —Give the eligibility criteria, and the sources and methods of case ascertainment and control selection. Give the rationale for the choice of cases and controls<br><i>Cross-sectional study</i> —Give the eligibility criteria, and the sources and methods of selection of participants | 5                  |
|                           |        | (b) <i>Cohort study</i> —For matched studies, give matching criteria and number of exposed and unexposed<br><i>Case-control study</i> —For matched studies, give matching criteria and the number of controls per case                                                                                                                                                                                                                                                 | 5                  |
| Variables                 | 7      | Clearly define all outcomes, exposures, predictors, potential confounders, and effect modifiers. Give diagnostic criteria, if applicable                                                                                                                                                                                                                                                                                                                               | 5                  |
| Data sources/ measurement | 8*     | For each variable of interest, give sources of data and details of methods of assessment (measurement). Describe comparability of assessment methods if there is more than one group                                                                                                                                                                                                                                                                                   | 5-7                |
| Bias                      | 9      | Describe any efforts to address potential sources of bias                                                                                                                                                                                                                                                                                                                                                                                                              | 5                  |
| Study size                | 10     | Explain how the study size was arrived at                                                                                                                                                                                                                                                                                                                                                                                                                              |                    |
| Quantitative variables    | 11     | Explain how quantitative variables were handled in the analyses. If applicable, describe which groupings were chosen and why                                                                                                                                                                                                                                                                                                                                           | 5                  |
| Statistical methods       | 12     | (a) Describe all statistical methods, including those used to control for confounding                                                                                                                                                                                                                                                                                                                                                                                  | 6-7                |
|                           |        | (b) Describe any methods used to examine subgroups and interactions                                                                                                                                                                                                                                                                                                                                                                                                    | 5-7                |
|                           |        | (c) Explain how missing data were addressed                                                                                                                                                                                                                                                                                                                                                                                                                            | 5                  |
|                           |        | (d) <i>Cohort study</i> —If applicable, explain how loss to follow-up was addressed<br><i>Case-control study</i> —If applicable, explain how matching of cases and controls was addressed                                                                                                                                                                                                                                                                              | 5                  |

|                          |     |                                                                                                                                                                                                              |      |
|--------------------------|-----|--------------------------------------------------------------------------------------------------------------------------------------------------------------------------------------------------------------|------|
|                          |     | <i>Cross-sectional study</i> —If applicable, describe analytical methods taking account of sampling strategy                                                                                                 |      |
|                          |     | (e) Describe any sensitivity analyses                                                                                                                                                                        |      |
| <b>Results</b>           |     |                                                                                                                                                                                                              |      |
| Participants             | 13* | (a) Report numbers of individuals at each stage of study—eg numbers potentially eligible, examined for eligibility, confirmed eligible, included in the study, completing follow-up, and analysed            | 7    |
|                          |     | (b) Give reasons for non-participation at each stage                                                                                                                                                         | 7    |
|                          |     | (c) Consider use of a flow diagram                                                                                                                                                                           | 7    |
| Descriptive data         | 14* | (a) Give characteristics of study participants (eg demographic, clinical, social) and information on exposures and potential confounders                                                                     | 7-8  |
|                          |     | (b) Indicate number of participants with missing data for each variable of interest                                                                                                                          | 7    |
|                          |     | (c) <i>Cohort study</i> —Summarise follow-up time (eg, average and total amount)                                                                                                                             | 7    |
| Outcome data             | 15* | <i>Cohort study</i> —Report numbers of outcome events or summary measures over time                                                                                                                          | 7    |
|                          |     | <i>Case-control study</i> —Report numbers in each exposure category, or summary measures of exposure                                                                                                         |      |
|                          |     | <i>Cross-sectional study</i> —Report numbers of outcome events or summary measures                                                                                                                           | 7    |
| Main results             | 16  | (a) Give unadjusted estimates and, if applicable, confounder-adjusted estimates and their precision (eg, 95% confidence interval). Make clear which confounders were adjusted for and why they were included |      |
|                          |     | (b) Report category boundaries when continuous variables were categorized                                                                                                                                    |      |
|                          |     | (c) If relevant, consider translating estimates of relative risk into absolute risk for a meaningful time period                                                                                             |      |
| Other analyses           | 17  | Report other analyses done—eg analyses of subgroups and interactions, and sensitivity analyses                                                                                                               |      |
| <b>Discussion</b>        |     |                                                                                                                                                                                                              |      |
| Key results              | 18  | Summarise key results with reference to study objectives                                                                                                                                                     | 9    |
| Limitations              | 19  | Discuss limitations of the study, taking into account sources of potential bias or imprecision. Discuss both direction and magnitude of any potential bias                                                   | 11   |
| Interpretation           | 20  | Give a cautious overall interpretation of results considering objectives, limitations, multiplicity of analyses, results from similar studies, and other relevant evidence                                   | 9-10 |
| Generalisability         | 21  | Discuss the generalisability (external validity) of the study results                                                                                                                                        | 11   |
| <b>Other information</b> |     |                                                                                                                                                                                                              |      |
| Funding                  | 22  | Give the source of funding and the role of the funders for the present study and, if applicable, for the original study on which the present article is based                                                | 11   |

\*Give information separately for cases and controls in case-control studies and, if applicable, for exposed and unexposed groups in cohort and cross-sectional studies.

**Note:** An Explanation and Elaboration article discusses each checklist item and gives methodological background and published examples of transparent reporting. The STROBE checklist is best used in conjunction with this article (freely available on the Web sites of PLoS Medicine at <http://www.plosmedicine.org/>, Annals of Internal Medicine at <http://www.annals.org/>, and Epidemiology at <http://www.epidem.com/>). Information on the STROBE Initiative is available at [www.strobe-statement.org](http://www.strobe-statement.org).





**Hypometabolism in the supplementary and anterior cingulate cortices is related to dysphagia in Parkinson's disease: a cross-sectional and 3-year longitudinal cohort study**



|                                 |                                                                                                                                                                                                                                                                                                                                                                                                                                                                                                                                                                                                                                                                                                                                                                                                                                                                                                                                                                                                                                                                                                                                                                                                                                                                                                                                                                                                                                                                                                                                                                                                                                                                                                                                                                                                                                                                                                                                                                                                                                  |
|---------------------------------|----------------------------------------------------------------------------------------------------------------------------------------------------------------------------------------------------------------------------------------------------------------------------------------------------------------------------------------------------------------------------------------------------------------------------------------------------------------------------------------------------------------------------------------------------------------------------------------------------------------------------------------------------------------------------------------------------------------------------------------------------------------------------------------------------------------------------------------------------------------------------------------------------------------------------------------------------------------------------------------------------------------------------------------------------------------------------------------------------------------------------------------------------------------------------------------------------------------------------------------------------------------------------------------------------------------------------------------------------------------------------------------------------------------------------------------------------------------------------------------------------------------------------------------------------------------------------------------------------------------------------------------------------------------------------------------------------------------------------------------------------------------------------------------------------------------------------------------------------------------------------------------------------------------------------------------------------------------------------------------------------------------------------------|
| Journal:                        | <i>BMJ Open</i>                                                                                                                                                                                                                                                                                                                                                                                                                                                                                                                                                                                                                                                                                                                                                                                                                                                                                                                                                                                                                                                                                                                                                                                                                                                                                                                                                                                                                                                                                                                                                                                                                                                                                                                                                                                                                                                                                                                                                                                                                  |
| Manuscript ID:                  | bmjopen-2012-002249.R1                                                                                                                                                                                                                                                                                                                                                                                                                                                                                                                                                                                                                                                                                                                                                                                                                                                                                                                                                                                                                                                                                                                                                                                                                                                                                                                                                                                                                                                                                                                                                                                                                                                                                                                                                                                                                                                                                                                                                                                                           |
| Article Type:                   | Research                                                                                                                                                                                                                                                                                                                                                                                                                                                                                                                                                                                                                                                                                                                                                                                                                                                                                                                                                                                                                                                                                                                                                                                                                                                                                                                                                                                                                                                                                                                                                                                                                                                                                                                                                                                                                                                                                                                                                                                                                         |
| Date Submitted by the Author:   | 19-Dec-2012                                                                                                                                                                                                                                                                                                                                                                                                                                                                                                                                                                                                                                                                                                                                                                                                                                                                                                                                                                                                                                                                                                                                                                                                                                                                                                                                                                                                                                                                                                                                                                                                                                                                                                                                                                                                                                                                                                                                                                                                                      |
| Complete List of Authors:       | <p>Kikuchi, Akio; Tohoku University Graduate School of Medicine, Department of Neurology<br/>         Baba, Toru; Tohoku University Graduate School of Medicine, Department of Neurology<br/>         Hasegawa, Takafumi; Tohoku University Graduate School of Medicine, Department of Neurology<br/>         Kobayashi, Michiko; Tohoku University Graduate School of Medicine, Department of Neurology<br/>         Sugeno, Naoto; Tohoku University Graduate School of Medicine, Department of Neurology<br/>         Konno, Masatoshi; Tohoku University Graduate School of Medicine, Department of Neurology<br/>         Miura, Emiko; Tohoku University Graduate School of Medicine, Department of Neurology<br/>         Hosokai, Yoshiyuki; Tohoku University Graduate School of Medicine, Department of Behavioral Neurology and Cognitive Neuroscience<br/>         Ishioka, Toshiyuki; Saitama Prefectural University, Department of Occupational Therapy<br/>         Nishio, Yoshiyuki; Tohoku University Graduate School of Medicine, Department of Behavioral Neurology and Cognitive Neuroscience<br/>         Hirayama, Kazumi; Yamagata Prefectural University of Health Sciences, Department of Occupational Therapy<br/>         Suzuki, Kyoko; Yamagata University Graduate School of Medicine, Department of Clinical Neuroscience<br/>         Aoki, Masashi; Tohoku University Graduate School of Medicine, Department of Neurology<br/>         Takahashi, Shoki; Tohoku University Graduate School of Medicine, Department of Diagnostic Radiology<br/>         Fukuda, Hiroshi; Tohoku University, Department of Nuclear Medicine and Radiology<br/>         Itoyama, Yasuto; National Center of Neurology and Psychiatry, National Center Hospital<br/>         Mori, Etsuro; Tohoku University Graduate School of Medicine, Department of Behavioral Neurology and Cognitive Neuroscience<br/>         Takeda, Atsushi; Tohoku University Graduate School of Medicine, Department of Neurology</p> |
| <b>Primary Subject Heading</b>: | Neurology                                                                                                                                                                                                                                                                                                                                                                                                                                                                                                                                                                                                                                                                                                                                                                                                                                                                                                                                                                                                                                                                                                                                                                                                                                                                                                                                                                                                                                                                                                                                                                                                                                                                                                                                                                                                                                                                                                                                                                                                                        |

1  
2  
3  
4  
5  
6  
7  
8  
9  
10  
11  
12  
13  
14  
15  
16  
17  
18  
19  
20  
21  
22  
23  
24  
25  
26  
27  
28  
29  
30  
31  
32  
33  
34  
35  
36  
37  
38  
39  
40  
41  
42  
43  
44  
45  
46  
47  
48  
49  
50  
51  
52  
53  
54  
55  
56  
57  
58  
59  
60

|                            |                                     |
|----------------------------|-------------------------------------|
| Secondary Subject Heading: | Neurology                           |
| Keywords:                  | PARKINSON'S DISEASE, DYSPHAGIA, PET |
|                            |                                     |

SCHOLARONE™  
Manuscripts

For peer review only

1  
2  
3  
4  
5  
6  
7  
8  
9  
10  
11  
12  
13  
14  
15  
16  
17  
18  
19  
20  
21  
22  
23  
24  
25  
26  
27  
28  
29  
30  
31  
32  
33  
34  
35  
36  
37  
38  
39  
40  
41  
42  
43  
44  
45  
46  
47  
48  
49  
50  
51  
52  
53  
54  
55  
56  
57  
58  
59  
60

# Hypometabolism in the supplementary and anterior cingulate cortices is related to dysphagia in Parkinson's disease: a cross-sectional and 3-year longitudinal cohort study

Akio Kikuchi,<sup>1</sup> Toru Baba,<sup>1</sup> Takafumi Hasegawa,<sup>1</sup> Michiko Kobayashi,<sup>1,2</sup> Naoto Sugeno,<sup>1</sup> Masatoshi Konno,<sup>1</sup> Emiko Miura,<sup>1</sup> Yoshiyuki Hosokai,<sup>3</sup> Toshiyuki Ishioka,<sup>3,4</sup> Yoshiyuki Nishio,<sup>3</sup> Kazumi Hirayama,<sup>3,5</sup> Kyoko Suzuki,<sup>3,6</sup> Masashi Aoki,<sup>1</sup> Shoki Takahashi,<sup>7</sup> Hiroshi Fukuda,<sup>8</sup> Yasuto Itoyama,<sup>1,9</sup> Etsuro Mori,<sup>3</sup> Atsushi Takeda<sup>1</sup>

<sup>1</sup> Department of Neurology, Tohoku University Graduate School of Medicine, Sendai, Japan

<sup>2</sup> Department of Neurology, Tohoku Employees' Pension Welfare Hospital, Sendai, Japan.

<sup>3</sup> Department of Behavioral Neurology and Cognitive Neuroscience, Tohoku University Graduate School of Medicine, Sendai, Japan

<sup>4</sup> Department of Occupational Therapy, School of Health and Social Services, Saitama Prefectural University, Saitama, Japan

<sup>5</sup> Department of Occupational Therapy, Yamagata Prefectural University of Health Sciences, Yamagata, Japan

<sup>6</sup> Department of Clinical Neuroscience, Yamagata University Graduate School of Medicine, Yamagata, Japan

<sup>7</sup> Department of Diagnostic Radiology, Tohoku University Graduate School of Medicine, Sendai, Japan

<sup>8</sup> Department of Nuclear Medicine and Radiology, Institute of Development, Aging and Cancer, Tohoku University, Sendai, Japan

<sup>9</sup> National Center Hospital, National Center of Neurology and Psychiatry (NCNP), Tokyo, Japan

Corresponding Author: Atsushi Takeda, M.D.

Department of Neurology, Tohoku University Graduate School of Medicine

1-1 Seiryomachi, Aoba-ku, Sendai, Miyagi, 980-8574, Japan

Phone: +81-22-717-7189 Fax: +81-22-717-7192

E-mail: atakeda@med.tohoku.ac.jp

**Text word count:** 2201

**Abstract word count:** 261

**Number of references:** 40

**Number of tables:** 1

**Number of figures:** 4

## 1 ABSTRACT

2 **Background:** Dysphagia is one of the cardinal symptoms of Parkinson's disease (PD) and is  
3 closely related to the quality of life and longevity of PD patients.

4 **Objective:** To study the pathophysiological mechanisms responsible for dysphagia in PD.

5 **Design:** A cross-sectional and longitudinal comparative study.

6 **Setting:** Tohoku university hospital.

7 **Participants:** Eight patients with dysphagia, 15 patients without dysphagia and 10 normal  
8 control subjects.

9 **Main Outcome Measures:** The time needed for swallowing initiation and changes in brain  
10 glucose metabolism at baseline and after a 3-year follow-up period.

11 **Results:** The time needed for swallowing initiation was significantly longer in the patients  
12 with dysphagia compared with the patients without dysphagia at baseline and after the 3-year  
13 follow-up period ( $p<0.05$ ). The patients with dysphagia exhibited hypometabolism in the  
14 supplementary motor area (SMA) and anterior cingulate cortex (ACC) compared with the 10  
15 normal control subjects at baseline (uncorrected  $p<0.001$ ). After the 3-year follow-up period,  
16 the number of brain areas showing hypometabolism increased, involving not only the SMA  
17 and the ACC but also the bilateral medial frontal lobes, middle cingulate cortex, thalamus and  
18 right superior, middle, inferior and orbital frontal gyri (uncorrected  $p<0.001$ ). In contrast, the  
19 patients without dysphagia showed virtually no regional hypometabolism at baseline  
20 (uncorrected  $p<0.001$ ) and only a small degree of hypometabolism in the SMA and ACC after  
21 the 3-year follow-up period (uncorrected  $p<0.001$ ).

22 **Conclusions:** These results suggest that dysphagia in PD patients is mainly related to a  
23 difficulty in swallowing initiation that is based on a combination of poor movement planning  
24 due to SMA dysfunction and impaired cognitive processing due to ACC dysfunction.

## ARTICLE SUMMARY

### Article focus

- Cortical hypometabolism associated with dysphagia in PD were statistically examined at baseline and after a 3-year follow-up period.

### Key messages

- The multiple cortical impairments, mainly in the SMA and ACC, might be responsible for the dysphagia in PD.
- The time needed for swallowing initiation was significantly longer in the patients with dysphagia.
- Dysphagia in PD patients is mainly related to a difficulty in swallowing initiation that is based on a combination of poor movement planning due to SMA dysfunction and impaired cognitive processing due to ACC dysfunction.

### Strengths and limitations of this study

- Strength: this study is the first to statistically examine the associations between cortical hypometabolism and dysphagia in PD patients as a cross-sectional and longitudinal comparative study.
- Limitation: the findings may not be related to dysphagia alone because  $^{18}\text{F}$ -fluorodeoxyglucose-PET cannot be used for a dynamic scanning during swallowing. Weakness: the absence of videofluoroscopy as swallowing evaluation.

## 1 INTRODUCTION

2 Parkinson's disease (PD) is primarily characterized by motor dysfunctions, some of which,  
3 such as tremor, rigidity, and bradykinesia, respond well to dopamine replacement therapy,  
4 whereas others, such as postural instability, dysarthria, and dysphagia, remain intractable and  
5 often impair quality of life in advanced cases. The involvement of non-dopaminergic systems  
6 is implied in such dopamine-refractory symptoms; however, the detailed pathophysiological  
7 mechanisms of these systems are still elusive. In particular, swallowing difficulty is directly  
8 associated with malnutrition and difficulty in drug taking; moreover, this symptom sometimes  
9 results in aspiration pneumonia, the main cause of death in PD patients.<sup>1-3</sup> The voluntary  
10 transport of food through the oral cavity, pharynx, and esophagus to the stomach requires  
11 sequential motor events. Deglutition occurs through five consecutive phases: anticipatory  
12 (cognitive), preparatory (masticatory), oral, pharyngeal, and esophageal. Dysphagia is  
13 associated with all of these stages.<sup>4-8</sup>

14 In general, dysphagia in PD is thought to reflect impaired function of the medullary  
15 swallowing center<sup>9</sup>. The involvement of higher central nervous system areas is also implied,  
16 but remains to be elucidated. In the present study, we investigated the swallowing functions  
17 of PD patients and compared them with changes in cortical metabolism using  
18 <sup>18</sup>F-fluorodeoxyglucose (FDG)-PET. Moreover, we investigated clinical and imaging data not  
19 only at baseline, but also after a 3-year follow-up period, making this research a longitudinal  
20 study.

## 21 METHODS

### 22 Participants

23 All of the 43 PD patients were diagnosed based on the United Kingdom PD Brain Bank

1  
2  
3 1 criteria for idiopathic PD.<sup>10</sup> The extent of dementia was evaluated in all of the subjects, using  
4  
5 2 the clinical dementia rating (CDR). PD patients with a CDR score greater than 0.5 were  
6  
7 3 excluded to minimize artifacts related to cognitive impairment. We defined a score of 0 as no  
8  
9 4 dysphagia and a score of >1 as dysphagia, according to Part II of the unified Parkinson's  
10  
11 5 disease rating scale (UPDRS). The UPDRS total scores, mini-mental state examination  
12  
13 6 (MMSE), evaluation of swallowing, and PET studies were evaluated during the "on" state,  
14  
15 7 i.e., with the administration of anti-parkinsonian drugs without L-dopa induced dyskinesia.  
16  
17 8 Ten age-matched control subjects (4 women and 6 men; mean age 64.4±4.12 years; mean  
18  
19 9 MMSE score 28.7±1.49) were collected to compare with PD patients with and without  
20  
21 10 dysphagia for PET analysis. All of the procedures were approved by the Ethical Committee  
22  
23 11 of Tohoku University Graduate School of Medicine. Written informed consent was obtained  
24  
25 12 from each subject after a full explanation of the entire 3-year longitudinal study.  
26  
27  
28  
29  
30  
31

### 32 **PET procedure**

33  
34 15 The FDG-PET scans were performed in all 23 PD patients and 10 age-matched control  
35  
36 16 subjects. All of the subjects fasted for at least 5 hours prior to PET scanning. To minimize the  
37  
38 17 effects of external stimuli during a 1-hour FDG uptake period after intravenous injection of  
39  
40 18 185-218 MBq FDG, the subjects stayed in a quiet room wearing an eye mask under resting  
41  
42 19 conditions. PET scans were acquired for 10 minutes under resting conditions. Dynamic PET  
43  
44 20 scans were taken in 3D mode using a Biograph<sup>TM</sup> Duo PET scanner (Siemens Medical  
45  
46 21 Systems, Inc., Iselin, NJ, USA). The in-plane and axial resolutions of the scanner were 3.38  
47  
48 22 mm and 3.38 mm, respectively. Attenuation correction was performed with a computed  
49  
50 23 tomography scan. Image reconstructions were performed using ordered subset expectation  
51  
52 24 maximization algorithms (16 subsets x 6 iterations) using a Gaussian filter with full-width at  
53  
54  
55  
56  
57  
58  
59  
60

1  
2  
3 1 half-maximum = 2.0 mm in a 256 x 256 matrix, with a pixel size of 1.33 x 1.33 mm and a  
4  
5 2 slice thickness of 2.0 mm, and a field of view of 340 mm. The FDG-PET scans acquired at  
6  
7 3 the follow-up were performed in an identical manner.  
8  
9  
10 4

### 5 **Data analysis**

6 Statistical parametric mapping (SPM) was used for group comparisons of PET images. First,  
7  
8 all of the PET images were spatially normalized with linear and nonlinear parameters using  
9  
10 SPM2 software (Wellcome Department of Imaging Neuroscience, London, UK) implemented  
11  
12 in MATLAB® (The MathWorks, Inc., Sherborn, MA, USA). A three-dimensional Gaussian  
13  
14 filter of 10 mm was used to smooth each image. Global normalization was performed using  
15  
16 SPM's "proportional scaling," and proportional threshold masking was set at 0.8. Next, the  
17  
18 regional metabolic abnormalities in the PD patients with and without dysphagia at baseline  
19  
20 and after the 3-year follow-up period were estimated by comparison with 10 age-matched  
21  
22 control subjects using proportional scaling. The statistical threshold was  $p < 0.001$   
23  
24 (uncorrected) with an extent threshold of 40 voxels.  
25  
26  
27  
28  
29  
30  
31  
32  
33  
34  
35  
36  
37  
38

### 39 **Evaluation of swallowing**

40 We evaluated the time needed for swallowing initiation and the 30-second swallowing  
41  
42 frequency in all 23 PD patients and 10 healthy volunteers. The index and ring finger pads of  
43  
44 the investigator were placed on the thyroid cartilage and laryngeal prominence. The time  
45  
46 needed for swallowing initiation was defined as the time until movement of the thyroid  
47  
48 cartilage and laryngeal prominence following the verbal guidance cue to begin swallowing  
49  
50 using a timer. The time of swallowing initiation across three trials was averaged. We also  
51  
52 measured the swallowing frequency by asking the patients to swallow as many times as  
53  
54  
55  
56  
57  
58  
59  
60



1 possible in 30 seconds and counting the movements of the thyroid cartilage and laryngeal  
2 prominence.<sup>11, 12</sup>

3 The patient profiles were statistically analyzed using two-sample t-tests. For the  
4 swallowing function, the within-group differences of the patients with and without dysphagia  
5 were assessed using paired t-tests.

## 7 RESULTS

8 Of the 43 potentially eligible cases, 16 were excluded from the analysis because of dementia.

9 The 27 patients who fulfilled the above entry criteria included 9 patients with dysphagia and  
10 18 patients without dysphagia. The mean ( $\pm$ standard deviation) age was  $68.2\pm 3.23$  years in  
11 the patients with dysphagia and  $65.8\pm 3.94$  years in the patients without dysphagia. All of the  
12 patients were right-handed. Eight of 9 PD patients with dysphagia and 15 of 18 without  
13 dysphagia at baseline participated in the 3-year follow-up study. The details of the excluded  
14 patients were as follows: 2 patients without dysphagia went to other hospitals, and 1 patient  
15 without dysphagia and 1 patient with dysphagia were unable to be evaluated during the  
16 follow-up period because of the introduction of a feeding tube (figure 1).

17 Clinical features and medications were summarized in table 1. No significant differences  
18 were found in the age, Hoehn-Yahr stage, dosage of anti-parkinsonian agents, including  
19 L-dopa (table 1), or 30-second swallowing frequency (figure 2B), but significant differences  
20 were found between the two groups in disease duration, UPDRS motor score, and time  
21 needed for swallowing initiation at baseline ( $p<0.05$ , table 1, figure 2A). After the 3-year  
22 follow-up period, the differences in the time needed for swallowing initiation were still clear,  
23 but no significant differences became evident in the UPDRS motor scores (table 1, figure 2A).  
24 Significant differences were revealed in the swallowing frequency within 30 seconds between

1  
2  
3 1 the two groups ( $p < 0.05$ , table 1, figure 2B). The time needed for swallowing initiation  
4  
5 2 ( $1.02 \pm 0.36$  sec) and the 30-second swallowing frequency ( $5.10 \pm 2.42$ ) in 10 healthy  
6  
7 3 volunteers were the almost same as those of PD without dysphagia. There was no significant  
8  
9 4 difference in the L-dopa equivalent dose between baseline and 3-year follow-up in PD with  
10  
11 5 dysphagia using paired t-test ( $p > 0.05$ ), while a significant difference was found in PD  
12  
13 6 without dysphagia ( $p < 0.05$ ). No significant differences were found in the UPDRS motor  
14  
15 7 score between baseline and 3-year follow-up within groups using paired t-tests ( $p > 0.05$ ).

18  
19 8 A comparison of the regional cerebral glucose of PD patients with that of normal controls  
20  
21 9 demonstrated hypometabolism in the supplementary motor area (SMA) and the anterior  
22  
23 10 cingulate cortex (ACC) in the patients with dysphagia at baseline (uncorrected  $p < 0.001$ ,  
24  
25 11 figure 3A). These metabolic changes showed no significant correlations with the severity of  
26  
27 12 the Hoehn-Yahr stages (uncorrected  $p < 0.001$ , data not shown) or the UPDRS motor scores  
28  
29 13 (uncorrected  $p < 0.001$ , data not shown). Furthermore, no regional hypermetabolism was  
30  
31 14 found in the PD patients with dysphagia compared with the normal control subjects  
32  
33 15 (uncorrected  $p < 0.001$ , data not shown). Additionally, no relationships were observed between  
34  
35 16 the changes in the regional cerebral glucose metabolism and the doses of anti-parkinsonian  
36  
37 17 agents, including L-dopa ( $p > 0.05$ , data not shown). After the 3-year follow-up period, the  
38  
39 18 areas of hypometabolism included not only the SMA and the ACC but also the bilateral  
40  
41 19 medial frontal lobes, middle cingulate cortex, thalamus and right superior, middle, inferior  
42  
43 20 and orbital frontal gyri (uncorrected  $p < 0.001$ , figure 3B). Only a small degree of  
44  
45 21 hypermetabolism in the left middle and right superior occipital lobes, left middle temporal  
46  
47 22 lobe, left supramarginal gyrus, and left calcarine cortex was found in PD patients with  
48  
49 23 dysphagia compared to the normal control subjects (uncorrected  $p < 0.001$ , data not shown). In  
50  
51 24 contrast, PD patients without dysphagia showed virtually no regional hypometabolism at  
52  
53  
54  
55  
56  
57  
58  
59  
60

1  
2  
3 1 baseline (uncorrected  $p < 0.001$ , figure 4A) and only a small degree of hypometabolism in the  
4  
5 2 SMA and the ACC after the 3-year follow-up period (uncorrected  $p < 0.001$ , figure 4B)  
6  
7 3 compared with normal controls. On the other hand, in PD patients without dysphagia, no  
8  
9 4 regional hypermetabolism was found at baseline (uncorrected  $p < 0.001$ , data not shown) and  
10  
11 5 only a small degree of hypermetabolism in the left supramarginal gyrus, left postcentral gyrus,  
12  
13 6 and left middle and superior lobes was found after the 3-year follow-up period (uncorrected  
14  
15 7  $p < 0.001$ , data not shown). Medullary hypometabolism was not found at baseline nor after a  
16  
17 8 3-year follow-up period (uncorrected  $p < 0.001$ , figures 3, 4).  
18  
19  
20  
21  
22

## 23 **DISCUSSION**

24  
25 11 The present results suggested that, although several motor cortical areas control deglutition,  
26  
27 12 multiple cortical impairments, mainly in the SMA and ACC, might be responsible for the  
28  
29 13 dysphagia in PD. These results were in agreement with the findings of previous activation  
30  
31 14 studies of normal deglutition such as functional MRI<sup>13-18</sup> and PET<sup>19, 20</sup>. Impairments in these  
32  
33 15 areas did not appear to be closely associated with the degree of general motor dysfunction  
34  
35 16 and cognitive impairments, as no significant correlations were found between the UPDRS  
36  
37 17 motor scores or the MMSE scores and the degree of hypometabolism in these areas  
38  
39 18 (uncorrected  $p < 0.001$ , data not shown). Moreover, although there were no significant changes  
40  
41 19 in the UPDRS motor scores and the MMSE scores, except for the L-dopa equivalent dose in  
42  
43 20 PD without dysphagia, between baseline and 3-year follow-up in each group (table 1),  
44  
45 21 cortical hypometabolism in the medial frontal lobes was markedly extended, especially in the  
46  
47 22 cases with dysphagia (figure 3). Interestingly, in the patients with dysphagia, both of the  
48  
49 23 swallowing indices showed tendencies toward exacerbation during the 3-year follow-up  
50  
51 24 period, although the differences were not significant (figure 2). Although no significant  
52  
53  
54  
55  
56  
57  
58  
59  
60

1  
2  
3 1 difference was found in the UPDRS motor score between PD with and without dysphagia  
4  
5 2 after a 3-year follow-up, the time needed for swallowing initiation was worsening in PD with  
6  
7 3 dysphagia. Bradykinesia did not appear to be directly related to the outcome measurement  
8  
9  
10 4 results for evaluation of swallowing. We could not find any compensatory mechanisms for  
11  
12 5 dysphagia because regional hypermetabolism was not found in PD with and without  
13  
14 6 dysphagia at baseline.

15  
16 7 Major subcortical inputs to the SMA via the thalamus arise from the globus pallidus and  
17  
18 8 the substantia nigra.<sup>21</sup> The SMA also receives limbic inputs from the cingulate cortex.<sup>22</sup> The  
19  
20 9 SMA is known to be important in mediating and preparing complex sequences of  
21  
22 10 movement<sup>23</sup> and in movement planning and execution.<sup>24-28</sup> PET and functional magnetic  
23  
24 11 resonance imaging studies demonstrated SMA activation during the swallowing task.<sup>19, 29</sup>  
25  
26  
27 12 Activation of the SMA preceding the onset of volitional swallowing can also be demonstrated  
28  
29 13 by the assessment of the Bereitschaftspotential, one of the premotor potentials that is  
30  
31 14 considered to reflect the activities of the SMA.<sup>30</sup> The amplitude of the  
32  
33 15 Bereitschaftspotential<sup>31</sup> was shown to be significantly lower in PD patients compared with  
34  
35 16 age-matched controls.<sup>32</sup> PET and single-photon emission computed tomography studies also  
36  
37 17 demonstrated dysfunction of the SMA in PD.<sup>33-37</sup> Therefore, the SMA dysfunction in PD  
38  
39 18 patients with dysphagia is likely to be related to the impaired volitional initiation of  
40  
41 19 swallowing.

42  
43  
44  
45 20 The ACC is connected to both the insula<sup>38</sup> and the amygdale,<sup>39</sup> which are implicated in  
46  
47 21 autonomic function and somato- and viscerosensory input. Intense stimulation of the  
48  
49 22 esophagus<sup>8, 40</sup> and changes in gastrointestinal motility<sup>39</sup> were shown to activate the ACC. The  
50  
51 23 ACC is thought to play an important role in receiving sensory stimuli from the alimentary  
52  
53 24 tract. The functions of the rostral ACC are autonomic regulation and visceromotor control.<sup>14</sup>  
54  
55  
56  
57  
58  
59  
60

1  
2  
3 1 In fact, the rostral ACC is activated during automatic swallowing.<sup>14</sup> In contrast, the more  
4  
5 2 dorsal and caudal regions of the ACC function in skeletomotor control, including movement  
6  
7 3 regulation and premotor function, response selection, attention to willed action, and  
8  
9 4 nociception.<sup>26</sup> The intermediate and caudal regions of the ACC are activated during voluntary  
10  
11 5 swallowing.<sup>14, 18, 41</sup> As PD patients with dysphagia showed hypometabolism in the  
12  
13 6 intermediate and caudal regions of the ACC, corresponding to Brodmann's area 24 as shown  
14  
15 7 in figure 3A, the dysphagia in PD patients appears to be associated with difficulties in the  
16  
17 8 processing of voluntary swallowing. In fact, the mean time needed to initiate swallowing was  
18  
19 9 longer in cases with dysphagia (figure 2).

20  
21  
22  
23 10 In this study, the time needed for swallowing initiation and swallowing frequency for 30  
24  
25 11 seconds showed high reproducibility. The time needed for swallowing initiation was thought  
26  
27 12 to reflect the time from the anticipatory to the pharyngeal stages of deglutition, was measured,  
28  
29 13 but other stages were not evaluated. Additional evaluation, such as videofluoroscopy, is  
30  
31 14 needed to understand the relationship between brain hypometabolism and dysphagia in PD  
32  
33 15 patients. Interestingly, in 4 of 8 patients with dysphagia, the time needed for swallowing  
34  
35 16 initiation was above average (2.35 sec), and, in fact, percutaneous endoscopic gastrostomies  
36  
37 17 were performed in 2 of these 4 patients within 4 years of the baseline study. Thus, by  
38  
39 18 measuring the time needed for swallowing initiation, we may be able to predict the long-term  
40  
41 19 prognosis of swallowing difficulty.  
42  
43  
44  
45  
46

## 47 **CONCLUSION**

48  
49 22 In conclusion, the data presented in this study suggested that dysphagia in PD patients was  
50  
51 23 related to dysfunctions in the SMA and the ACC, resulting in poor movement planning of  
52  
53 24 voluntary swallowing. The results also suggest that training exercises, which can activate  
54  
55  
56  
57  
58  
59  
60

1  
2  
3 1 broader cortical areas including the SMA and ACC,<sup>17</sup> may be useful to alleviate swallowing  
4  
5 2 difficulty.  
6  
7  
8 3

9  
10 4 **Contributors:** Conception and design: Akio Kikuchi, Atsushi Takeda. Analysis and  
11 5 interpretation of the data: Akio Kikuchi, Toru Baba, Atsushi Takeda. Drafting of the article:  
12 6 Akio Kikuchi, Atsushi Takeda. Collection and assembly of data: All authors.

13 7 **Funding:** This study was supported by a grant for a Symposium on Catecholamine and  
14 8 Neurological Disorders and a Grant-in-Aid for Scientific Research (C) (23591266) from The  
15 9 Ministry of Education, Culture, Sports, Science and Technology (MEXT), Japan. The funders  
16 10 had no role in study design, data collection and analysis, decision to publish, or preparation of  
17 11 the manuscript.  
18 12

19 13 **Competing interests:** None.

20 14 **Patient consent:** Standardised patient consent forms were signed by all patients and controls.

21 15 **Ethics approval:** Ethics approval was provided by the Ethical Committee of Tohoku  
22 16 University Graduate School of Medicine.

23 17 **Provenance and peer review:** Not commissioned; externally peer reviewed.

24 18 **Data sharing statement:** No additional data are available.  
25  
26  
27  
28  
29  
30  
31  
32  
33  
34  
35  
36  
37  
38  
39  
40  
41  
42  
43  
44  
45  
46  
47  
48  
49  
50  
51  
52  
53  
54  
55  
56  
57  
58  
59  
60

1  
2  
3 **REFERENCES**

- 4  
5 1. Nakashima K, Maeda M, Tabata M, et al. Prognosis of Parkinson's disease in Japan.  
6 Tottori University Parkinson's Disease Epidemiology (TUPDE) Study Group. *Eur Neurol*  
7 1997;38 Suppl 2:60-3.
- 8 2. Hely MA, Morris JG, Traficante R, et al. The sydney multicentre study of  
9 Parkinson's disease: progression and mortality at 10 years. *J Neurol Neurosurg Psychiatry*  
10 1999;67:300-7.
- 11 3. Fall PA, Saleh A, Fredrickson M, et al. Survival time, mortality, and cause of death  
12 in elderly patients with Parkinson's disease: a 9-year follow-up. *Mov Disord* 2003;18:1312-6.
- 13 4. Bushmann M, Dobmeyer SM, Leeker L, et al. Swallowing abnormalities and their  
14 response to treatment in Parkinson's disease. *Neurology* 1989;39:1309-14.
- 15 5. Bird MR, Woodward MC, Gibson EM, et al. Asymptomatic swallowing disorders in  
16 elderly patients with Parkinson's disease: a description of findings on clinical examination  
17 and videofluoroscopy in sixteen patients. *Age Ageing* 1994;23:251-4.
- 18 6. Leopold NA, Kagel MC. Prepharyngeal dysphagia in Parkinson's disease. *Dysphagia*  
19 1996;11:14-22.
- 20 7. Leopold NA, Kagel MC. Pharyngo-esophageal dysphagia in Parkinson's disease.  
21 *Dysphagia* 1997;12:11-8; discussion 9-20.
- 22 8. Aziz Q, Andersson JL, Valind S, et al. Identification of human brain loci processing  
23 esophageal sensation using positron emission tomography. *Gastroenterology* 1997;113:50-9.
- 24 9. Hunter PC, Cramer J, Austin S, et al. Response of parkinsonian swallowing  
25 dysfunction to dopaminergic stimulation. *J Neurol Neurosurg Psychiatry* 1997;63:579-83.
- 26 10. Gibb WR, Lees AJ. The relevance of the Lewy body to the pathogenesis of  
27 idiopathic Parkinson's disease. *J Neurol Neurosurg Psychiatry* 1988;51:745-52.
- 28 11. Oguchi K, Saitoh E, Mizuno M, et al. The repetitive saliva swallowing test (RSST)  
29 as a screening test of functional dysphagia (1) normal values of RSST. *Jpn J Rehabil Med*  
30 2000;37:375-82.
- 31 12. Tamura F, Mizukami M, Ayano R, et al. Analysis of feeding function and jaw  
32 stability in bedridden elderly. *Dysphagia* 2002;17:235-41.
- 33 13. Kern MK, Jaradeh S, Arndorfer RC, et al. Cerebral cortical representation of  
34 reflexive and volitional swallowing in humans. *Am J Physiol Gastrointest Liver Physiol*  
35 2001;280:G354-60.
- 36 14. Martin RE, Goodyear BG, Gati JS, et al. Cerebral cortical representation of  
37 automatic and volitional swallowing in humans. *J Neurophysiol* 2001;85:938-50.
- 38 15. Martin R, Barr A, MacIntosh B, et al. Cerebral cortical processing of swallowing in  
39 older adults. *Exp Brain Res* 2007;176:12-22.
- 40 16. Mosier K, Bereznaya I. Parallel cortical networks for volitional control of  
41 swallowing in humans. *Exp Brain Res* 2001;140:280-9.
- 42 17. Martin RE, MacIntosh BJ, Smith RC, et al. Cerebral areas processing swallowing  
43 and tongue movement are overlapping but distinct: a functional magnetic resonance imaging  
44 study. *J Neurophysiol* 2004;92:2428-43.
- 45 18. Toogood JA, Barr AM, Stevens TK, et al. Discrete functional contributions of  
46 cerebral cortical foci in voluntary swallowing: a functional magnetic resonance imaging  
47 (fMRI) "Go, No-Go" study. *Exp Brain Res* 2005;161:81-90.
- 48 19. Hamdy S, Rothwell JC, Brooks DJ, et al. Identification of the cerebral loci  
49 processing human swallowing with H2(15)O PET activation. *J Neurophysiol*  
50 1999;81:1917-26.
- 51 20. Harris ML, Julyan P, Kulkarni B, et al. Mapping metabolic brain activation during

- 1 human volitional swallowing: a positron emission tomography study using  
2 [18F]fluorodeoxyglucose. *J Cereb Blood Flow Metab* 2005;25:520-6.
- 3 21. Hoover JE, Strick PL. Multiple output channels in the basal ganglia. *Science*  
4 1993;259:819-21.
- 5 22. Tanji J. The supplementary motor area in the cerebral cortex. *Neurosci Res*  
6 1994;19:251-68.
- 7 23. Fried I, Katz A, McCarthy G, et al. Functional organization of human supplementary  
8 motor cortex studied by electrical stimulation. *J Neurosci* 1991;11:3656-66.
- 9 24. Dum RP, Strick PL. The origin of corticospinal projections from the premotor areas  
10 in the frontal lobe. *J Neurosci* 1991;11:667-89.
- 11 25. Dum RP, Strick PL. Motor areas in the frontal lobe of the primate. *Physiol Behav*  
12 2002;77:677-82.
- 13 26. Devinsky O, Morrell MJ, Vogt BA. Contributions of anterior cingulate cortex to  
14 behaviour. *Brain* 1995;118 (Pt 1):279-306.
- 15 27. Deiber MP, Ibanez V, Sadato N, et al. Cerebral structures participating in motor  
16 preparation in humans: a positron emission tomography study. *J Neurophysiol*  
17 1996;75:233-47.
- 18 28. Richter W, Andersen PM, Georgopoulos AP, et al. Sequential activity in human  
19 motor areas during a delayed cued finger movement task studied by time-resolved fMRI.  
20 *Neuroreport* 1997;8:1257-61.
- 21 29. Mosier K, Patel R, Liu WC, et al. Cortical representation of swallowing in normal  
22 adults: functional implications. *Laryngoscope* 1999;109:1417-23.
- 23 30. Huckabee ML, Deecke L, Cannito MP, et al. Cortical control mechanisms in  
24 volitional swallowing: the Bereitschaftspotential. *Brain Topogr* 2003;16:3-17.
- 25 31. Kornhuber HH, Deecke L. [Changes In The Brain Potential In Voluntary  
26 Movements And Passive Movements In Man: Readiness Potential And Reafferent  
27 Potentials.]. *Pflugers Arch Gesamte Physiol Menschen Tiere* 1965;284:1-17.
- 28 32. Dick JP, Rothwell JC, Day BL, et al. The Bereitschaftspotential is abnormal in  
29 Parkinson's disease. *Brain* 1989;112 (Pt 1):233-44.
- 30 33. Playford ED, Jenkins IH, Passingham RE, et al. Impaired mesial frontal and putamen  
31 activation in Parkinson's disease: a positron emission tomography study. *Ann Neurol*  
32 1992;32:151-61.
- 33 34. Grafton ST, Waters C, Sutton J, et al. Pallidotomy increases activity of motor  
34 association cortex in Parkinson's disease: a positron emission tomographic study. *Ann Neurol*  
35 1995;37:776-83.
- 36 35. Jahanshahi M, Jenkins IH, Brown RG, et al. Self-initiated versus externally triggered  
37 movements. I. An investigation using measurement of regional cerebral blood flow with PET  
38 and movement-related potentials in normal and Parkinson's disease subjects. *Brain* 1995;118  
39 (Pt 4):913-33.
- 40 36. Brooks DJ. PET and SPECT studies in Parkinson's disease. *Baillieres Clin Neurol*  
41 1997;6:69-87.
- 42 37. Kikuchi A, Takeda A, Kimpara T, et al. Hypoperfusion in the supplementary motor  
43 area, dorsolateral prefrontal cortex and insular cortex in Parkinson's disease. *J Neurol Sci*  
44 2001;193:29-36.
- 45 38. Mesulam MM, Mufson EJ. Insula of the old world monkey. III: Efferent cortical  
46 output and comments on function. *J Comp Neurol* 1982;212:38-52.
- 47 39. Pandya DN, Van Hoesen GW, Domesick VB. A cingulo-amygdaloid projection in  
48 the rhesus monkey. *Brain Res* 1973;61:369-73.



- 1  
2  
3 1 40. Kern MK, Birn RM, Jaradeh S, et al. Identification and characterization of cerebral  
4 2 cortical response to esophageal mucosal acid exposure and distention. *Gastroenterology*  
5 3 1998;115:1353-62.  
6 4 41. Paus T, Otaky N, Caramanos Z, et al. In vivo morphometry of the intrasulcal gray  
7 5 matter in the human cingulate, paracingulate, and superior-rostral sulci: hemispheric  
8 6 asymmetries, gender differences and probability maps. *J Comp Neurol* 1996;376:664-73.  
9 7  
10 8  
11 9  
12  
13  
14  
15  
16  
17  
18  
19  
20  
21  
22  
23  
24  
25  
26  
27  
28  
29  
30  
31  
32  
33  
34  
35  
36  
37  
38  
39  
40  
41  
42  
43  
44  
45  
46  
47  
48  
49  
50  
51  
52  
53  
54  
55  
56  
57  
58  
59  
60

For peer review only

1 **Table 1** Profiles of PD patients

| Parameters                      | Baseline       |                   | Follow-up      |                   |
|---------------------------------|----------------|-------------------|----------------|-------------------|
|                                 | With dysphagia | Without dysphagia | With dysphagia | Without dysphagia |
| Number of patients              | 8              | 15                |                |                   |
| Sex (M / W)                     | 6/ 2           | 4 /11             |                |                   |
| Age (yrs)                       |                |                   |                |                   |
| Mean                            | 67.8±3.11      | 65.2±4.02         |                |                   |
| Range                           | 63-71          | 60-74             |                |                   |
| Disease duration (yrs)          | 6.75±3.73*     | 3.53±3.58         |                |                   |
| MMSE                            | 28.5±1.93      | 28.5±1.51         | 27.9±2.80      | 28.4±1.60         |
| Hoehn-Yahr stage                | 2.75±0.27      | 2.37±0.67         | 3.06±0.42      | 2.93±0.53         |
| UPDRS motor score               | 23.4±7.05*     | 14.8±7.49         | 21.0±5.93      | 17.4±11.1         |
| L-dopa equivalent dose (mg/day) | 400±311        | 267±321           | 590±155        | 514±311           |

26 Values are mean±standard deviation or number of patients.

27 \*Significant difference  $p < 0.05$  between with dysphagia and without dysphagia.

28 PD=Parkinson's disease; M=men; W=women; MMSE=Mini Mental State Examination;

29 UPDRS=unified Parkinson's disease rating scale

30 2

1  
2  
3  
4  
5  
6  
7 | **Hypometabolism in the supplementary and anterior cingulate**  
8 | **cortices is related to dysphagia in Parkinson's disease: a**  
9 | **cross-sectional and 3-year longitudinal cohort study**  
10  
11  
12  
13

14 6 Akio Kikuchi,<sup>1</sup> Toru Baba,<sup>1</sup> Takafumi Hasegawa,<sup>1</sup> Michiko Kobayashi,<sup>1,2</sup> Naoto Sugeno,<sup>1</sup>  
15 7 Masatoshi Konno,<sup>1</sup> Emiko Miura,<sup>1</sup> Yoshiyuki Hosokai,<sup>3</sup> Toshiyuki Ishioka,<sup>3,4</sup> Yoshiyuki  
16 8 Nishio,<sup>3</sup> Kazumi Hirayama,<sup>3,5</sup> Kyoko Suzuki,<sup>3,6</sup> Masashi Aoki,<sup>1</sup> Shoki Takahashi,<sup>7</sup> Hiroshi  
17 9 Fukuda,<sup>8</sup> Yasuto Itoyama,<sup>1,9</sup> Etsuro Mori,<sup>3</sup> Atsushi Takeda<sup>1</sup>  
18  
19  
20  
21

22 <sup>1</sup> Department of Neurology, Tohoku University Graduate School of Medicine, Sendai, Japan

23 <sup>2</sup> Department of Neurology, Tohoku Employees' Pension Welfare Hospital, Sendai, Japan.

24 <sup>3</sup> Department of Behavioral Neurology and Cognitive Neuroscience, Tohoku University Graduate School of  
25 15 Medicine, Sendai, Japan

26 <sup>4</sup> Department of Occupational Therapy, School of Health and Social Services, Saitama Prefectural University,  
27 17 Saitama, Japan

28 <sup>5</sup> Department of Occupational Therapy, Yamagata Prefectural University of Health Sciences, Yamagata, Japan

29 <sup>6</sup> Department of Clinical Neuroscience, Yamagata University Graduate School of Medicine, Yamagata, Japan

30 <sup>7</sup> Department of Diagnostic Radiology, Tohoku University Graduate School of Medicine, Sendai, Japan

31 <sup>8</sup> Department of Nuclear Medicine and Radiology, Institute of Development, Aging and Cancer, Tohoku  
32 21 University, Sendai, Japan

33 <sup>9</sup> National Center Hospital, National Center of Neurology and Psychiatry (NCNP), Tokyo, Japan  
34 22  
35 23  
36 24  
37 25

38 26 Corresponding Author: Atsushi Takeda, M.D.

39 27 Department of Neurology, Tohoku University Graduate School of Medicine

40 28 1-1 Seiryomachi, Aoba-ku, Sendai, Miyagi, 980-8574, Japan

41 29 Phone: +81-22-717-7189 Fax: +81-22-717-7192

42 30 E-mail: atakeda@med.tohoku.ac.jp  
43 31  
44 32  
45 33

46 34 **Text word count:** 2201

47 35 **Abstract word count:** 261

48 36 **Number of references:** 40

49 37 **Number of tables:** 1

50 38 **Number of figures:** 4  
51  
52  
53  
54  
55  
56  
57  
58  
59  
60

Formatted: Numbering: Restart each page

1  
2  
3  
4  
5  
6  
7 **ABSTRACT**

8 **Background:** Dysphagia is one of the cardinal symptoms of Parkinson's disease (PD) and is  
9  
10 closely related to the quality of life and longevity of PD patients.

11  
12 **Objective:** To study the pathophysiological mechanisms responsible for dysphagia in PD.

13  
14 **Design:** A cross-sectional and longitudinal comparative study.

15  
16 **Setting:** Tohoku university hospital.

17  
18 **Participants:** Eight patients with dysphagia, 15 patients without dysphagia and 10 normal  
19  
20 control subjects.

21  
22 **Main Outcome Measures:** The time needed for swallowing initiation and changes in brain  
23  
24 glucose metabolism at baseline and after a 3-year follow-up period.

25  
26 **Results:** The time needed for swallowing initiation was significantly longer in the patients  
27  
28 with dysphagia compared with the patients without dysphagia at baseline and after the 3-year  
29  
30 follow-up period ( $p<0.05$ ). The patients with dysphagia exhibited hypometabolism in the  
31  
32 supplementary motor area (SMA) and anterior cingulate cortex (ACC) compared with the 10  
33  
34 normal control subjects at baseline (uncorrected  $p<0.001$ ). After the 3-year follow-up period,  
35  
36 the number of brain areas showing hypometabolism increased, involving not only the SMA  
37  
38 and the ACC but also the bilateral medial frontal lobes, middle cingulate cortex, thalamus and  
39  
40 right superior, middle, inferior and orbital frontal gyri (uncorrected  $p<0.001$ ). In contrast, the  
41  
42 patients without dysphagia showed virtually no regional hypometabolism at baseline  
43  
44 (uncorrected  $p<0.001$ ) and only a small degree of hypometabolism in the SMA and ACC after  
45  
46 the 3-year follow-up period (uncorrected  $p<0.001$ ).

47  
48 **Conclusions:** These results suggest that dysphagia in PD patients is mainly related to a  
49  
50 difficulty in swallowing initiation that is based on a combination of poor movement planning  
51  
52 due to SMA dysfunction and impaired cognitive processing due to ACC dysfunction.

## ARTICLE SUMMARY

### Article focus

- Cortical hypometabolism associated with dysphagia in PD were statistically examined at baseline and after a 3-year follow-up period.

### Key messages

- The multiple cortical impairments, mainly in the SMA and ACC, might be responsible for the dysphagia in PD.
- The time needed for swallowing initiation was significantly longer in the patients with dysphagia.
- Dysphagia in PD patients is mainly related to a difficulty in swallowing initiation that is based on a combination of poor movement planning due to SMA dysfunction and impaired cognitive processing due to ACC dysfunction.

### Strengths and limitations of this study

- Strength: this study is the first to statistically examine the associations between cortical hypometabolism and dysphagia in PD patients as a cross-sectional and longitudinal comparative study.
- Limitation: the findings may not be related to dysphagia alone because  $^{18}\text{F}$ -fluorodeoxyglucose-PET cannot be used for a dynamic scanning during swallowing. Weakness: the absence of videofluoroscopy as swallowing evaluation.

## INTRODUCTION

Parkinson's disease (PD) is primarily characterized by motor dysfunctions, some of which, such as tremor, rigidity, and bradykinesia, respond well to dopamine replacement therapy, whereas others, such as postural instability, dysarthria, and dysphagia, remain intractable and often impair quality of life in advanced cases. The involvement of non-dopaminergic systems is implied in such dopamine-refractory symptoms; however, the detailed pathophysiological mechanisms of these systems are still elusive. In particular, ~~swallowing difficulty~~ **dysphagia** is directly associated with malnutrition and difficulty in drug taking; moreover, this symptom sometimes results in aspiration pneumonia, the main cause of death in PD patients.<sup>1-3</sup> The voluntary transport of food through the oral cavity, pharynx, and esophagus to the stomach requires sequential motor events. Deglutition occurs through five consecutive phases: anticipatory (cognitive), preparatory (masticatory), oral, pharyngeal, and esophageal.

Dysphagia is associated with all of these stages.<sup>4-8</sup>

In general, dysphagia in PD is thought to reflect impaired function of the medullary swallowing center.<sup>9</sup> The involvement of higher central nervous system areas is also implied, but remains to be elucidated. In the present study, we investigated the swallowing functions of PD patients and compared them with changes in cortical metabolism using <sup>18</sup>F-fluorodeoxyglucose (FDG)-PET. Moreover, we investigated clinical and imaging data not only at baseline, but also after a 3-year follow-up period, making this research a longitudinal study.

## METHODS

### Participants

All of the 43 PD patients were diagnosed based on the United Kingdom PD Brain Bank

Field Code Changed

Field Code Changed

Formatted: Font color: Red

1 criteria for idiopathic PD.<sup>109</sup> The extent of dementia was evaluated in all of the subjects,  
2 using the clinical dementia rating (CDR). PD patients with a CDR score greater than 0.5 were  
3 excluded to minimize artifacts related to cognitive impairment. We defined a score of 0 as no  
4 dysphagia and a score of >1 as dysphagia, according to Part II of the unified Parkinson's  
5 disease rating scale (UPDRS). The UPDRS total scores, mini-mental state examination  
6 (MMSE), evaluation of swallowing, and PET studies were evaluated during the "on" state,  
7 i.e., with the administration of anti-parkinsonian drugs without L-dopa induced dyskinesia.  
8 Ten age-matched control subjects (4 women and 6 men; mean age 64.4±4.12 years; mean  
9 MMSE score 28.7±1.49) were collected to compare with PD patients with and without  
10 dysphagia for PET analysis. All of the procedures were approved by the Ethical Committee  
11 of Tohoku University Graduate School of Medicine. Written informed consent was obtained  
12 from each subject after a full explanation of the entire 3-year longitudinal study.

#### 14 **PET procedure**

15 The FDG-PET scans were performed in all 23 PD patients and 10 age-matched control  
16 subjects. All of the subjects fasted for at least 5 hours prior to PET scanning. ~~PET scans were~~  
17 ~~acquired 60 minutes after intravenous injection of 185-218 MBq FDG. Dynamic PET scans~~  
18 ~~were taken in three-dimensional mode using a Biograph™ Duo PET scanner (Siemens~~  
19 ~~Medical Systems, Inc., Iselin, NJ, USA).~~ To minimize the effects of external stimuli during a  
20 1-hour the FDG uptake period after intravenous injection of 185-218 MBq FDG, the subjects  
21 stayed in a quiet room wearing an eye mask under resting conditions. PET scans were  
22 acquired for 10 minutes under resting conditions. Dynamic PET scans were taken in 3D  
23 mode using a Biograph™ Duo PET scanner (Siemens Medical Systems, Inc., Iselin, NJ,  
24 USA). The in-plane and axial resolutions of the scanner were 3.38 mm and 3.38 mm,

Field Code Changed

Formatted: Font color: Red

1  
2  
3  
4  
5  
6  
7 1 respectively. Attenuation correction was performed with a computed tomography scan. Image  
8  
9 2 reconstructions were performed using ordered subset expectation maximization algorithms  
10  
11 3 (16 subsets x 6 iterations) using a Gaussian filter with full-width at half-maximum = 2.0 mm  
12  
13 4 in a 256 x 256 matrix, with a pixel size of 1.33 x 1.33 mm and a slice thickness of 2.0 mm,  
14  
15 5 and a field of view of 340 mm. The FDG-PET scans acquired at the follow-up were  
16  
17 6 performed in an identical manner.  
18  
19 7

## 20 8 **Data analysis**

21  
22 9 Statistical parametric mapping (SPM) was used for group comparisons of PET images. First,  
23  
24 10 all of the PET images were spatially normalized with linear and nonlinear parameters using  
25  
26 11 SPM2 software (Wellcome Department of Imaging Neuroscience, London, UK) implemented  
27  
28 12 in MATLAB® (The MathWorks, Inc., Sherborn, MA, USA). A three-dimensional Gaussian  
29  
30 13 filter of 10 mm was used to smooth each image. Global normalization was performed using  
31  
32 14 SPM's "proportional scaling," and proportional threshold masking was set at 0.8. Next, the  
33  
34 15 regional metabolic abnormalities in the PD patients with and without dysphagia at baseline  
35  
36 16 and after the 3-year follow-up period were estimated by comparison with 10 age-matched  
37  
38 17 control subjects using proportional scaling. The statistical threshold was  $p < 0.001$   
39  
40 18 (uncorrected) with an extent threshold of 40 voxels.  
41  
42 19

## 43 20 **Evaluation of swallowing**

44  
45 21 We evaluated the time needed for swallowing initiation and the 30-second swallowing  
46  
47 22 frequency in all 23 PD patients and 10 healthy volunteers. The index and ring finger pads of  
48  
49 23 the investigator were placed on the thyroid cartilage and laryngeal prominence. The time  
50  
51 24 needed for swallowing initiation was defined as the time until movement of the thyroid  
52



1 cartilage and laryngeal prominence following the verbal guidance cue to begin swallowing  
2 using a timer. The time of swallowing initiation across three trials was averaged. We also  
3 measured the swallowing frequency by asking the patients to swallow as many times as  
4 possible in 30 seconds and counting the movements of the thyroid cartilage and laryngeal  
5 prominence.<sup>11, 12, 10, 11</sup>

Field Code Changed

6 The patient profiles were statistically analyzed using two-sample t-tests. For the  
7 swallowing function, the within-group differences of the patients with and without dysphagia  
8 were assessed using paired t-tests.

## 10 RESULTS

11 Of the 43 potentially eligible cases, 16 were excluded from the analysis because of dementia.  
12 The 27 patients who fulfilled the above entry criteria included 9 patients with dysphagia and  
13 18 patients without dysphagia. The mean ( $\pm$ standard deviation) age was  $68.2 \pm 3.23$  years in  
14 the patients with dysphagia and  $65.8 \pm 3.94$  years in the patients without dysphagia. All of the  
15 patients were right-handed. Eight of 9 PD patients with dysphagia and 15 of 18 without  
16 dysphagia at baseline participated in the 3-year follow-up study. The details of the excluded  
17 patients were as follows: 2 patients without dysphagia went to other hospitals, and 1 patient  
18 without dysphagia and 1 patient with dysphagia were unable to be evaluated during the  
19 follow-up period because of the introduction of a feeding tube (figure 1).

20 Clinical features and medications were summarized in table 1. No significant differences  
21 were found in the age, Hoehn-Yahr stage, dosage of anti-parkinsonian agents, including  
22 L-dopa (table 1), or 30-second swallowing frequency (figure 2B), but significant differences  
23 were found between the two groups in disease duration, UPDRS motor score, and time  
24 needed for swallowing initiation at baseline ( $p < 0.05$ , table 1, figure 2A). After the 3-year

1  
2  
3  
4  
5  
6  
7 1 follow-up period, the differences in the time needed for swallowing initiation were still clear,  
8  
9 2 but no significant differences became evident in the UPDRS motor scores (table 1, figure 2A).  
10  
11 3 Significant differences were revealed in the swallowing frequency within 30 seconds between  
12  
13 4 the two groups ( $p<0.05$ , table 1, figure 2B). The time needed for swallowing initiation  
14  
15 5 ( $1.02\pm 0.36$  sec) and the 30-second swallowing frequency ( $5.10\pm 2.42$ ) in 10 healthy  
16  
17 6 volunteers were the almost same as those of PD without dysphagia. There was no significant  
18  
19 7 difference in the L-dopa equivalent dose between baseline and 3-year follow-up in PD with  
20  
21 8 dysphagia using paired t-test ( $p>0.05$ ), while a significant difference was found in PD  
22  
23 9 without dysphagia ( $p<0.05$ ). No significant differences were found in the UPDRS motor  
24  
25 10 score between baseline and 3-year follow-up within groups using paired t-tests ( $p>0.05$ ).

26 11 A comparison of the regional cerebral glucose of PD patients with that of normal controls  
27  
28 12 demonstrated hypometabolism in the supplementary motor area (SMA) and the anterior  
29  
30 13 cingulate cortex (ACC) in the patients with dysphagia at baseline (uncorrected  $p<0.001$ ,  
31  
32 14 figure 3A). These metabolic changes showed no significant correlations with the severity of  
33  
34 15 the Hoehn-Yahr stages (uncorrected  $p<0.001$ , data not shown) or the UPDRS motor scores  
35  
36 16 (uncorrected  $p<0.001$ , data not shown). Furthermore, no regional hypermetabolism was  
37  
38 17 found in the PD patients with dysphagia compared with the normal control subjects  
39  
40 18 (uncorrected  $p<0.001$ , data not shown). Additionally, no relationships were observed between  
41  
42 19 the changes in the regional cerebral glucose metabolism and the doses of anti-parkinsonian  
43  
44 20 agents, including L-dopa ( $p>0.05$ , data not shown). After the 3-year follow-up period, the  
45  
46 21 areas of hypometabolism included not only the SMA and the ACC but also the bilateral  
47  
48 22 medial frontal lobes, middle cingulate cortex, thalamus and right superior, middle, inferior  
49  
50 23 and orbital frontal gyri (uncorrected  $p<0.001$ , figure 3B). Only a small degree of  
51  
52 24 hypermetabolism in the left middle and right superior occipital lobes, left middle temporal

1  
2  
3  
4  
5  
6  
7 lobe, left supramarginal gyrus, and left calcarine cortex was found in PD patients with  
8 dysphagia compared to the normal control subjects (uncorrected  $p < 0.001$ , data not shown). In  
9  
10 contrast, PD patients without dysphagia showed virtually no regional hypometabolism at  
11  
12 baseline (uncorrected  $p < 0.001$ , figure 4A) and only a small degree of hypometabolism in the  
13  
14 SMA and the ACC after the 3-year follow-up period (uncorrected  $p < 0.001$ , figure 4B)  
15  
16 compared with normal controls. On the other hand, in PD patients without dysphagia, no  
17  
18 regional hypermetabolism was found at baseline (uncorrected  $p < 0.001$ , data not shown) and  
19  
20 only a small degree of hypermetabolism in the left supramarginal gyrus, left postcentral gyrus,  
21  
22 and left middle and superior lobes was found after the 3-year follow-up period (uncorrected  
23  
24  $p < 0.001$ , data not shown). Medullary hypometabolism was not found at baseline nor after a  
25  
26 3-year follow-up period (uncorrected  $p < 0.001$ , figures 3, 4).  
27  
28  
29

## 30 DISCUSSION

31  
32 The present results suggested that, although several motor cortical areas control deglutition,  
33  
34 multiple cortical impairments, mainly in the SMA and ACC, might be responsible for the  
35  
36 dysphagia in PD. These results were in agreement with the findings of previous activation  
37  
38 studies of normal deglutition such as functional MRI<sup>13-18</sup> and PET<sup>19, 20, 13-2012-19</sup> Impairments in  
39  
40 these areas did not appear to be closely associated with the degree of general motor  
41  
42 dysfunction and cognitive impairments, as no significant correlations were found between the  
43  
44 UPDRS motor scores or the MMSE scores and the degree of hypometabolism in these areas  
45  
46 (uncorrected  $p < 0.001$ , data not shown). Moreover, although there were no significant changes  
47  
48 in the UPDRS motor scores and the MMSE scores, except for the L-dopa equivalent dose in  
49  
50 PD without dysphagia, between baseline and 3-year follow-up in each group (table 1),  
51  
52 cortical hypometabolism in the medial frontal lobes was markedly extended, especially in the  
53  
54  
55  
56  
57  
58  
59  
60

Formatted: Superscript

Formatted: Font color: Red

Field Code Changed

1  
2  
3  
4  
5  
6  
7  
8  
9  
10  
11  
12  
13  
14  
15  
16  
17  
18  
19  
20  
21  
22  
23  
24  
25  
26  
27  
28  
29  
30  
31  
32  
33  
34  
35  
36  
37  
38  
39  
40  
41  
42  
43  
44  
45  
46  
47  
48  
49  
50  
51  
52  
53  
54  
55  
56  
57  
58  
59  
60

cases with dysphagia (figure 3). Interestingly, in the patients with dysphagia, both of the swallowing indices showed tendencies toward exacerbation during the 3-year follow-up period, although the differences were not significant (figure 2). Although no significant difference was found in the UPDRS motor score between PD with and without dysphagia after a 3-year follow-up, the time needed for swallowing initiation was worsening in PD with dysphagia. Bradykinesia did not appear to be directly related to the outcome measurement results for evaluation of swallowing. We could not find any compensatory mechanisms for dysphagia because regional hypermetabolism was not found in PD with and without dysphagia at baseline.

Major subcortical inputs to the SMA via the thalamus arise from the globus pallidus and the substantia nigra.<sup>21,20</sup> The SMA also receives limbic inputs from the cingulate cortex.<sup>22,21</sup> The SMA is known to be important in mediating and preparing complex sequences of movement<sup>23,22</sup> and in movement planning and execution.<sup>24-28,23-27</sup> PET and functional magnetic resonance imaging studies demonstrated SMA activation during the swallowing task.<sup>19, 29,12-28</sup> Activation of the SMA preceding the onset of volitional swallowing can also be demonstrated by the assessment of the Bereitschaftspotential, one of the premotor potentials that is considered to reflect the activities of the SMA.<sup>30,29</sup> The amplitude of the Bereitschaftspotential<sup>31,30</sup> was shown to be significantly lower in PD patients compared with age-matched controls.<sup>32,31</sup> PET and single-photon emission computed tomography studies also demonstrated dysfunction of the SMA in PD.<sup>33-37,32-36</sup> Therefore, the SMA dysfunction in PD patients with dysphagia is likely to be related to the impaired volitional initiation of swallowing.

The ACC is connected to both the insula<sup>38,37</sup> and the amygdale,<sup>39,38</sup> which are implicated in autonomic function and somato- and viscerosensory input. Intense stimulation of the

Field Code Changed  
Field Code Changed

Field Code Changed  
Field Code Changed

Field Code Changed

Field Code Changed

Field Code Changed

Field Code Changed

Field Code Changed

Field Code Changed  
Field Code Changed

1 esophagus<sup>8, 408, 39</sup> and changes in gastrointestinal motility<sup>3938</sup> were shown to activate the ACC.

Field Code Changed

2 The ACC is thought to play an important role in receiving sensory stimuli from the

Field Code Changed

3 alimentary tract. The functions of the rostral ACC are autonomic regulation and visceromotor

4 control.<sup>14</sup> In fact, the rostral ACC is activated during automatic swallowing.<sup>14</sup> In contrast, the

Field Code Changed

Field Code Changed

5 more dorsal and caudal regions of the ACC function in skeletomotor control, including

6 movement regulation and premotor function, response selection, attention to willed action,

7 and nociception.<sup>2625</sup> The intermediate and caudal regions of the ACC are activated during

Field Code Changed

8 voluntary swallowing.<sup>14, 18, 41, 14, 19, 40</sup> As PD patients with dysphagia showed hypometabolism

Field Code Changed

9 in the intermediate and caudal regions of the ACC, corresponding to Brodmann's area 24 as

10 shown in figure 3A, the dysphagia in PD patients appears to be associated with difficulties in

11 the processing of voluntary swallowing. In fact, the mean time needed to initiate swallowing

12 was longer in cases with dysphagia (figure 2).

13 In this study, the time needed for swallowing initiation and swallowing frequency for 30  
14 seconds showed high reproducibility. ~~the~~ The time needed for swallowing initiation was  
15 thought to, which shows high repeatability and reflects the time from the anticipatory to the  
16 pharyngeal stages of deglutition, was measured, but other stages were not evaluated.

17 Additional evaluation, such as videofluoroscopy, is needed to understand the relationship  
18 between brain hypometabolism and dysphagia in PD patients. Interestingly, in 4 of 8 patients  
19 with dysphagia, the time needed for swallowing initiation was above average (2.35 sec), and,  
20 in fact, percutaneous endoscopic gastrostomies were performed in 2 of these 4 patients within  
21 4 years of the baseline study. Thus, by measuring the time needed for swallowing initiation,

22 we may be able to predict the long-term prognosis of swallowing difficulty~~dysphagia~~.

## 24 CONCLUSION

1  
2  
3  
4  
5  
6  
7 1 In conclusion, the data presented in this study suggested that dysphagia in PD patients was  
8  
9 2 related to dysfunctions in the SMA and the ACC, resulting in poor movement planning of  
10  
11 3 voluntary swallowing. The results also suggest that training exercises, which can activate  
12  
13 4 broader cortical areas including the SMA and ACC,<sup>17</sup> may be useful to alleviate swallowing  
14  
15 5 difficulty. ~~The results also implied that training exercises, possibly involving tongue-~~  
16  
17 6 ~~movements, may activate broader cortical areas, including the SMA and ACC,<sup>17</sup> and may be~~  
18  
19 7 ~~useful in dysphagia rehabilitation.~~

Field Code Changed

20  
21  
22 9 **Contributors:** Conception and design: Akio Kikuchi, Atsushi Takeda. Analysis and  
23  
24 10 interpretation of the data: Akio Kikuchi, Toru Baba, Atsushi Takeda. Drafting of the article:  
25  
26 11 Akio Kikuchi, Atsushi Takeda. Collection and assembly of data: All authors.

27 12 **Funding:** This study was supported by a grant for a Symposium on Catecholamine and  
28  
29 13 Neurological Disorders and a Grant-in-Aid for Scientific Research (C) (23591266) from The  
30  
31 14 Ministry of Education, Culture, Sports, Science and Technology (MEXT), Japan. The funders  
32  
33 15 had no role in study design, data collection and analysis, decision to publish, or preparation of  
34  
35 16 the manuscript.

36 17 **Competing interests:** None.

37 18 **Patient consent:** Standardised patient consent forms were signed by all patients and controls.

38 19 **Ethics approval:** Ethics approval was provided by the Ethical Committee of Tohoku  
39  
40 20 University Graduate School of Medicine.

41 21 **Provenance and peer review:** Not commissioned; externally peer reviewed.

42 22 **Data sharing statement:** No additional data are available.  
43  
44  
45  
46  
47  
48  
49  
50  
51  
52  
53  
54  
55  
56  
57  
58  
59  
60

1  
2  
3  
4  
5  
6  
7  
8  
9  
10  
11  
12  
13  
14  
15  
16  
17  
18  
19  
20  
21  
22  
23  
24  
25  
26  
27  
28  
29  
30  
31  
32  
33  
34  
35  
36  
37  
38  
39  
40  
41  
42  
43  
44  
45  
46  
47  
48  
49  
50  
51  
52  
53  
54  
55  
56  
57  
58  
59  
60  
**REFERENCES**

1. [Nakashima K, Maeda M, Tabata M, et al. Prognosis of Parkinson's disease in Japan. Tottori University Parkinson's Disease Epidemiology \(TUPDE\) Study Group. Eur Neurol 1997;38 Suppl 2:60-3.](#)
2. [Hely MA, Morris JG, Traficante R, et al. The sydney multicentre study of Parkinson's disease: progression and mortality at 10 years. J Neurol Neurosurg Psychiatry 1999;67:300-7.](#)
3. [Fall PA, Saleh A, Fredrickson M, et al. Survival time, mortality, and cause of death in elderly patients with Parkinson's disease: a 9-year follow-up. Mov Disord 2003;18:1312-6.](#)
4. [Bushmann M, Dobbmeyer SM, Leeker L, et al. Swallowing abnormalities and their response to treatment in Parkinson's disease. Neurology 1989;39:1309-14.](#)
5. [Bird MR, Woodward MC, Gibson EM, et al. Asymptomatic swallowing disorders in elderly patients with Parkinson's disease: a description of findings on clinical examination and videofluoroscopy in sixteen patients. Age Ageing 1994;23:251-4.](#)
6. [Leopold NA, Kagel MC. Prepharyngeal dysphagia in Parkinson's disease. Dysphagia 1996;11:14-22.](#)
7. [Leopold NA, Kagel MC. Pharyngo-esophageal dysphagia in Parkinson's disease. Dysphagia 1997;12:11-8; discussion 9-20.](#)
8. [Aziz Q, Andersson JL, Valind S, et al. Identification of human brain loci processing esophageal sensation using positron emission tomography. Gastroenterology 1997;113:50-9.](#)
9. [Hunter PC, Crameri J, Austin S, et al. Response of parkinsonian swallowing dysfunction to dopaminergic stimulation. J Neurol Neurosurg Psychiatry 1997;63:579-83.](#)
10. [Gibb WR, Lees AJ. The relevance of the Lewy body to the pathogenesis of idiopathic Parkinson's disease. J Neurol Neurosurg Psychiatry 1988;51:745-52.](#)
11. [Oguchi K, Saitoh E, Mizuno M, et al. The repetitive saliva swallowing test \(RSST\) as a screening test of functional dysphagia \(1\) normal values of RSST. Jpn J Rehabil Med 2000;37:375-82.](#)
12. [Tamura F, Mizukami M, Ayano R, et al. Analysis of feeding function and jaw stability in bedridden elderly. Dysphagia 2002;17:235-41.](#)
13. [Kern MK, Jaradeh S, Arndorfer RC, et al. Cerebral cortical representation of reflexive and volitional swallowing in humans. Am J Physiol Gastrointest Liver Physiol 2001;280:G354-60.](#)
14. [Martin RE, Goodyear BG, Gati JS, et al. Cerebral cortical representation of automatic and volitional swallowing in humans. J Neurophysiol 2001;85:938-50.](#)
15. [Martin R, Barr A, MacIntosh B, et al. Cerebral cortical processing of swallowing in older adults. Exp Brain Res 2007;176:12-22.](#)
16. [Mosier K, Bereznaya I. Parallel cortical networks for volitional control of swallowing in humans. Exp Brain Res 2001;140:280-9.](#)
17. [Martin RE, MacIntosh BJ, Smith RC, et al. Cerebral areas processing swallowing and tongue movement are overlapping but distinct: a functional magnetic resonance imaging study. J Neurophysiol 2004;92:2428-43.](#)
18. [Toogood JA, Barr AM, Stevens TK, et al. Discrete functional contributions of cerebral cortical foci in voluntary swallowing: a functional magnetic resonance imaging \(fMRI\) "Go, No-Go" study. Exp Brain Res 2005;161:81-90.](#)
19. [Hamdy S, Rothwell JC, Brooks DJ, et al. Identification of the cerebral loci processing human swallowing with H2\(15\)O PET activation. J Neurophysiol 1999;81:1917-26.](#)
20. [Harris ML, Julyan P, Kulkarni B, et al. Mapping metabolic brain activation during](#)

Formatted: Font: 12 pt

Formatted: Indent: Left: 0", First line: 0"

- 1  
2  
3  
4  
5  
6  
7 [human volitional swallowing: a positron emission tomography study using](#)  
8 [\[18F\]fluorodeoxyglucose. J Cereb Blood Flow Metab 2005;25:520-6.](#)  
9 21. [Hoover JE, Strick PL. Multiple output channels in the basal ganglia. Science](#)  
10 [1993;259:819-21.](#)  
11 22. [Tanji J. The supplementary motor area in the cerebral cortex. Neurosci Res](#)  
12 [1994;19:251-68.](#)  
13 23. [Fried I, Katz A, McCarthy G, et al. Functional organization of human supplementary](#)  
14 [motor cortex studied by electrical stimulation. J Neurosci 1991;11:3656-66.](#)  
15 24. [Dum RP, Strick PL. The origin of corticospinal projections from the premotor areas](#)  
16 [in the frontal lobe. J Neurosci 1991;11:667-89.](#)  
17 25. [Dum RP, Strick PL. Motor areas in the frontal lobe of the primate. Physiol Behav](#)  
18 [2002;77:677-82.](#)  
19 26. [Devinsky O, Morrell MJ, Vogt BA. Contributions of anterior cingulate cortex to](#)  
20 [behaviour. Brain 1995;118 \(Pt 1\):279-306.](#)  
21 27. [Deiber MP, Ibanez V, Sadato N, et al. Cerebral structures participating in motor](#)  
22 [preparation in humans: a positron emission tomography study. J Neurophysiol](#)  
23 [1996;75:233-47.](#)  
24 28. [Richter W, Andersen PM, Georgopoulos AP, et al. Sequential activity in human](#)  
25 [motor areas during a delayed cued finger movement task studied by time-resolved fMRI.](#)  
26 [Neuroreport 1997;8:1257-61.](#)  
27 29. [Mosier K, Patel R, Liu WC, et al. Cortical representation of swallowing in normal](#)  
28 [adults: functional implications. Laryngoscope 1999;109:1417-23.](#)  
29 30. [Huckabee ML, Deecke L, Cannito MP, et al. Cortical control mechanisms in](#)  
30 [volitional swallowing: the Bereitschaftspotential. Brain Topogr 2003;16:3-17.](#)  
31 31. [Kornhuber HH, Deecke L. \[Changes In The Brain Potential In Voluntary](#)  
32 [Movements And Passive Movements In Man: Readiness Potential And Reafferent](#)  
33 [Potentials.\]. Pflugers Arch Gesamte Physiol Menschen Tiere 1965;284:1-17.](#)  
34 32. [Dick JP, Rothwell JC, Day BL, et al. The Bereitschaftspotential is abnormal in](#)  
35 [Parkinson's disease. Brain 1989;112 \(Pt 1\):233-44.](#)  
36 33. [Playford ED, Jenkins IH, Passingham RE, et al. Impaired mesial frontal and putamen](#)  
37 [activation in Parkinson's disease: a positron emission tomography study. Ann Neurol](#)  
38 [1992;32:151-61.](#)  
39 34. [Grafton ST, Waters C, Sutton J, et al. Pallidotomy increases activity of motor](#)  
40 [association cortex in Parkinson's disease: a positron emission tomographic study. Ann Neurol](#)  
41 [1995;37:776-83.](#)  
42 35. [Jahanshahi M, Jenkins IH, Brown RG, et al. Self-initiated versus externally triggered](#)  
43 [movements. I. An investigation using measurement of regional cerebral blood flow with PET](#)  
44 [and movement-related potentials in normal and Parkinson's disease subjects. Brain 1995;118](#)  
45 [\(Pt 4\):913-33.](#)  
46 36. [Brooks DJ. PET and SPECT studies in Parkinson's disease. Baillieres Clin Neurol](#)  
47 [1997;6:69-87.](#)  
48 37. [Kikuchi A, Takeda A, Kimpara T, et al. Hypoperfusion in the supplementary motor](#)  
49 [area, dorsolateral prefrontal cortex and insular cortex in Parkinson's disease. J Neurol Sci](#)  
50 [2001;193:29-36.](#)  
51 38. [Mesulam MM, Mufson EJ. Insula of the old world monkey. III: Efferent cortical](#)  
52 [output and comments on function. J Comp Neurol 1982;212:38-52.](#)  
53 39. [Pandya DN, Van Hoesen GW, Domesick VB. A cingulo-amygdaloid projection in](#)  
54 [the rhesus monkey. Brain Res 1973;61:369-73.](#)



- 1  
2  
3  
4  
5  
6  
7  
8  
9  
10  
11  
12  
13  
14  
15  
16  
17  
18  
19  
20  
21  
22  
23  
24  
25  
26  
27  
28  
29  
30  
31  
32  
33  
34  
35  
36  
37  
38  
39  
40  
41  
42  
43  
44  
45  
46  
47  
48  
49  
50  
51  
52  
53  
54  
55  
56  
57  
58  
59  
60
40. Kern MK, Birn RM, Jaradeh S, et al. Identification and characterization of cerebral cortical response to esophageal mucosal acid exposure and distention. *Gastroenterology* 1998;115:1353-62.
  41. Paus T, Otaky N, Caramanos Z, et al. In vivo morphometry of the intrasulcal gray matter in the human cingulate, paracingulate, and superior-rostral sulci: hemispheric asymmetries, gender differences and probability maps. *J Comp Neurol* 1996;376:664-73.
  1. Nakashima K, Maeda M, Tabata M, et al. Prognosis of Parkinson's disease in Japan. Tottori University Parkinson's Disease Epidemiology (TUPDE) Study Group. *Eur Neurol* 1997;38 Suppl 2:60-3.
  2. Hely MA, Morris JG, Traficante R, et al. The sydney multicentre study of Parkinson's disease: progression and mortality at 10 years. *J Neurol Neurosurg Psychiatry* 1999;67:300-7.
  3. Fall PA, Saleh A, Fredrickson M, et al. Survival time, mortality, and cause of death in elderly patients with Parkinson's disease: a 9 year follow up. *Mov Disord* 2003;18:1312-6.
  4. Bushmann M, Dobmeyer SM, Lecker L, et al. Swallowing abnormalities and their response to treatment in Parkinson's disease. *Neurology* 1989;39:1309-14.
  5. Bird MR, Woodward MC, Gibson EM, et al. Asymptomatic swallowing disorders in elderly patients with Parkinson's disease: a description of findings on clinical examination and videofluoroscopy in sixteen patients. *Age Ageing* 1994;23:251-4.
  6. Leopold NA, Kagel MC. Prepharyngeal dysphagia in Parkinson's disease. *Dysphagia* 1996;11:14-22.
  7. Leopold NA, Kagel MC. Pharyngo-esophageal dysphagia in Parkinson's disease. *Dysphagia* 1997;12:11-8; discussion 9-20.
  8. Aziz Q, Andersson JL, Valind S, et al. Identification of human brain loci processing esophageal sensation using positron emission tomography. *Gastroenterology* 1997;113:50-9.
  9. Gibb WR, Lees AJ. The relevance of the Lewy body to the pathogenesis of idiopathic Parkinson's disease. *J Neurol Neurosurg Psychiatry* 1988;51:745-52.
  10. Oguchi K, Saitoh E, Mizuno M, et al. The repetitive saliva swallowing test (RSST) as a screening test of functional dysphagia (1) normal values of RSST. *Jpn J Rehabil Med* 2000;37:375-82.
  11. Tamura F, Mizukami M, Ayano R, et al. Analysis of feeding function and jaw stability in bedridden elderly. *Dysphagia* 2002;17:235-41.
  12. Hamdy S, Rothwell JC, Brooks DJ, et al. Identification of the cerebral loci processing human swallowing with H2(15)O PET activation. *J Neurophysiol* 1999;81:1917-26.
  13. Kern MK, Jaradeh S, Arndorfer RC, et al. Cerebral cortical representation of reflexive and volitional swallowing in humans. *Am J Physiol Gastrointest Liver Physiol* 2001;280:G354-60.
  14. Martin RE, Goodyear BG, Gati JS, et al. Cerebral cortical representation of automatic and volitional swallowing in humans. *J Neurophysiol* 2001;85:938-50.
  15. Martin R, Barr A, MacIntosh B, et al. Cerebral cortical processing of swallowing in older adults. *Exp Brain Res* 2007;176:12-22.
  16. Mosier K, Bereznaya I. Parallel cortical networks for volitional control of swallowing in humans. *Exp Brain Res* 2001;140:280-9.
  17. Martin RE, MacIntosh BJ, Smith RC, et al. Cerebral areas processing swallowing and tongue movement are overlapping but distinct: a functional magnetic resonance

Formatted: Indent: Left: 0", Hanging: 0.5"

- 1  
2  
3  
4  
5  
6  
7  
8  
9  
10  
11  
12  
13  
14  
15  
16  
17  
18  
19  
20  
21  
22  
23  
24  
25  
26  
27  
28  
29  
30  
31  
32  
33  
34  
35  
36  
37  
38  
39  
40  
41  
42  
43  
44  
45  
46  
47  
48  
49  
50  
51  
52  
53  
54  
55  
56  
57  
58  
59  
60
- 1 imaging study. *J Neurophysiol* 2004;92:2428-43.
- 2 ~~18. Harris ML, Julyan P, Kulkarni B, et al. Mapping metabolic brain activation during~~  
3 ~~human volitional swallowing: a positron emission tomography study using~~  
4 ~~[18F]fluorodeoxyglucose. *J Cereb Blood Flow Metab* 2005;25:520-6.~~
- 5 ~~19. Toogood JA, Barr AM, Stevens TK, et al. Discrete functional contributions of~~  
6 ~~cerebral cortical foci in voluntary swallowing: a functional magnetic resonance~~  
7 ~~imaging (fMRI) "Go, No-Go" study. *Exp Brain Res* 2005;161:81-90.~~
- 8 ~~20. Hoover JE, Strick PL. Multiple output channels in the basal ganglia. *Science*~~  
9 ~~1993;259:819-21.~~
- 10 ~~21. Tanji J. The supplementary motor area in the cerebral cortex. *Neurosci Res*~~  
11 ~~1994;19:251-68.~~
- 12 ~~22. Fried I, Katz A, McCarthy G, et al. Functional organization of human supplementary~~  
13 ~~motor cortex studied by electrical stimulation. *J Neurosci* 1991;11:3656-66.~~
- 14 ~~23. Dum RP, Strick PL. The origin of corticospinal projections from the premotor areas in~~  
15 ~~the frontal lobe. *J Neurosci* 1991;11:667-89.~~
- 16 ~~24. Dum RP, Strick PL. Motor areas in the frontal lobe of the primate. *Physiol Behav*~~  
17 ~~2002;77:677-82.~~
- 18 ~~25. Devinsky O, Morrell MJ, Vogt BA. Contributions of anterior cingulate cortex to~~  
19 ~~behaviour. *Brain* 1995;118 (Pt 1):279-306.~~
- 20 ~~26. Deiber MP, Ibanez V, Sadato N, et al. Cerebral structures participating in motor~~  
21 ~~preparation in humans: a positron emission tomography study. *J Neurophysiol*~~  
22 ~~1996;75:233-47.~~
- 23 ~~27. Richter W, Andersen PM, Georgopoulos AP, et al. Sequential activity in human~~  
24 ~~motor areas during a delayed cued finger movement task studied by time-resolved~~  
25 ~~fMRI. *Neuroreport* 1997;8:1257-61.~~
- 26 ~~28. Mosier K, Patel R, Liu WC, et al. Cortical representation of swallowing in normal~~  
27 ~~adults: functional implications. *Laryngoscope* 1999;109:1417-23.~~
- 28 ~~29. Huckabee ML, Deecke L, Cannito MP, et al. Cortical control mechanisms in~~  
29 ~~volitional swallowing: the Bereitschaftspotential. *Brain Topogr* 2003;16:3-17.~~
- 30 ~~30. Kornhuber HH, Deecke L. [Changes In The Brain Potential In Voluntary Movements~~  
31 ~~And Passive Movements In Man: Readiness Potential And Reafferent Potentials.]-~~  
32 ~~Pflugers Arch Gesamte Physiol Menschen Tiere 1965;284:1-17.~~
- 33 ~~31. Dick JP, Rothwell JC, Day BL, et al. The Bereitschaftspotential is abnormal in~~  
34 ~~Parkinson's disease. *Brain* 1989;112 (Pt 1):233-44.~~
- 35 ~~32. Playford ED, Jenkins IH, Passingham RE, et al. Impaired mesial frontal and putamen~~  
36 ~~activation in Parkinson's disease: a positron emission tomography study. *Ann Neurol*~~  
37 ~~1992;32:151-61.~~
- 38 ~~33. Grafton ST, Waters C, Sutton J, et al. Pallidotomy increases activity of motor~~  
39 ~~association cortex in Parkinson's disease: a positron emission tomographic study. *Ann*~~  
40 ~~*Neurol* 1995;37:776-83.~~
- 41 ~~34. Jahanshahi M, Jenkins IH, Brown RG, et al. Self initiated versus externally triggered~~  
42 ~~movements. I. An investigation using measurement of regional cerebral blood flow~~  
43 ~~with PET and movement related potentials in normal and Parkinson's disease~~  
44 ~~subjects. *Brain* 1995;118 (Pt 4):913-33.~~
- 45 ~~35. Brooks DJ. PET and SPECT studies in Parkinson's disease. *Baillieres Clin Neurol*~~  
46 ~~1997;6:69-87.~~
- 47 ~~36. Kikuchi A, Takeda A, Kimpara T, et al. Hypoperfusion in the supplementary motor~~  
48 ~~area, dorsolateral prefrontal cortex and insular cortex in Parkinson's disease. *J Neurol*~~

- 1  
2  
3  
4  
5  
6  
7  
8  
9  
10  
11  
12  
13  
14  
15  
16  
17  
18  
19  
20  
21  
22  
23  
24  
25  
26  
27  
28  
29  
30  
31  
32  
33  
34  
35  
36  
37  
38  
39  
40  
41  
42  
43  
44  
45  
46  
47  
48  
49  
50  
51  
52  
53  
54  
55  
56  
57  
58  
59  
60
- 1  
2  
3  
4  
5  
6  
7  
8  
9  
10  
11  
12  
13  
14  
15
- ~~Sci 2001;193:29-36.~~  
~~37. Mesulam MM, Mufson EJ. Insula of the old world monkey. III: Efferent cortical output and comments on function. J Comp Neurol 1982;212:38-52.~~  
~~38. Pandya DN, Van Hoesen GW, Domesick VB. A cingulo-amygdaloid projection in the rhesus monkey. Brain Res 1973;61:369-73.~~  
~~39. Kern MK, Birn RM, Jaradeh S, et al. Identification and characterization of cerebral cortical response to esophageal mucosal acid exposure and distention. Gastroenterology 1998;115:1353-62.~~  
~~40. Paus T, Otaky N, Caramanos Z, et al. In vivo morphometry of the intrasulcal gray matter in the human cingulate, paracingulate, and superior rostral sulci: hemispheric asymmetries, gender differences and probability maps. J Comp Neurol 1996;376:664-73.~~

1  
2  
3  
4  
5  
6  
7 **Table 1** Profiles of PD patients

| Parameters                      | Baseline       |                   | Follow-up      |                   |
|---------------------------------|----------------|-------------------|----------------|-------------------|
|                                 | With dysphagia | Without dysphagia | With dysphagia | Without dysphagia |
| Number of patients              | 8              | 15                |                |                   |
| Sex (M / W)                     | 6 / 2          | 4 / 11            |                |                   |
| Age (yrs)                       |                |                   |                |                   |
| Mean                            | 67.8±3.11      | 65.2±4.02         |                |                   |
| Range                           | 63-71          | 60-74             |                |                   |
| Disease duration (yrs)          | 6.75±3.73*     | 3.53±3.58         |                |                   |
| MMSE                            | 28.5±1.93      | 28.5±1.51         | 27.9±2.80      | 28.4±1.60         |
| Hoehn-Yahr stage                | 2.75±0.27      | 2.37±0.67         | 3.06±0.42      | 2.93±0.53         |
| UPDRS motor score               | 23.4±7.05*     | 14.8±7.49         | 21.0±5.93      | 17.4±11.1         |
| L-dopa equivalent dose (mg/day) | 400±311        | 267±321           | 590±155        | 514±311           |

26 Values are mean±standard deviation or number of patients.

27 \*Significant difference  $p < 0.05$  between with dysphagia and without dysphagia.

28 PD=Parkinson's disease; M=men; W=women; MMSE=Mini Mental State Examination;

29 UPDRS=unified Parkinson's disease rating scale

30  
31  
32

Formatted: Indent: Left: 0", First line: 0"

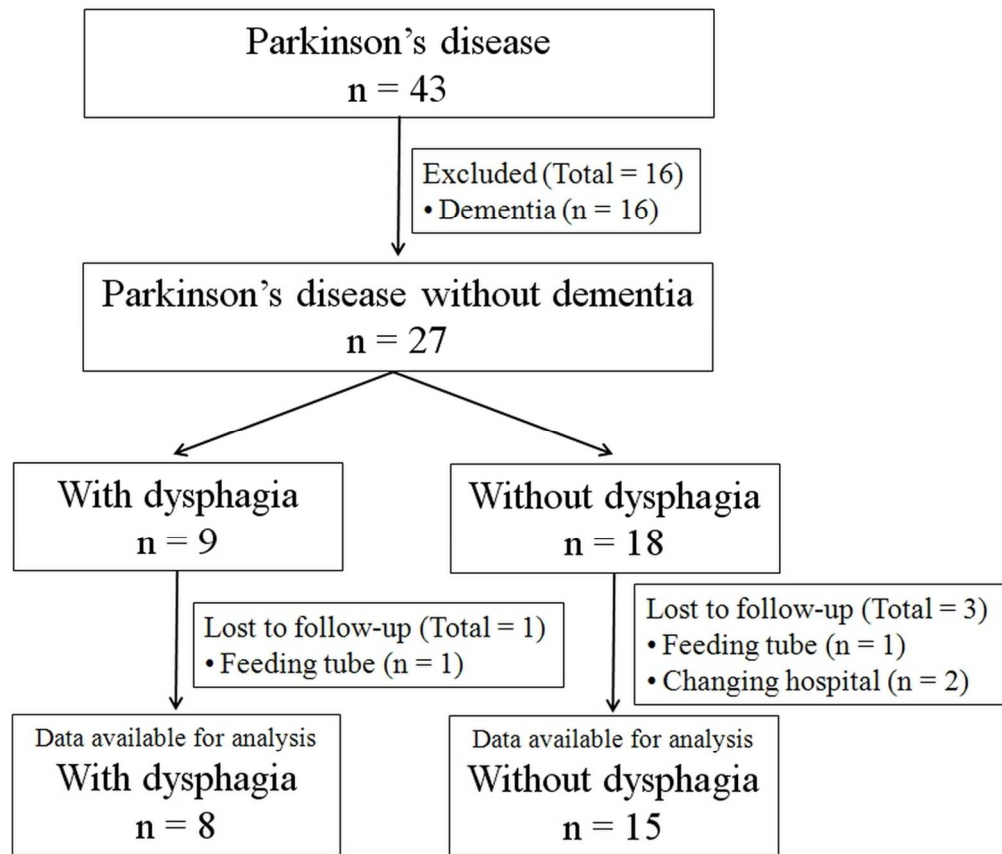

36 **PD patients and follow-up flow diagram.**  
37 105x90mm (300 x 300 DPI)

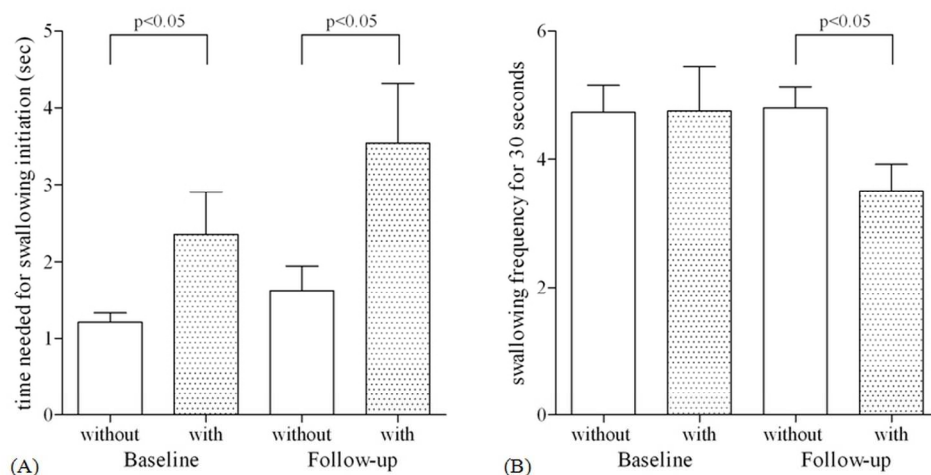

**The time needed for swallowing initiation and the 30-second swallowing frequency in PD patients with and without dysphagia at baseline and after a 3-year follow-up period.**

There were significant differences between PD patients with and without dysphagia in the time needed for swallowing initiation at baseline and after a 3-year follow-up period ( $p<0.05$ ) (A). In the 30-second swallowing frequency, there was no significant difference between the PD patients with and without dysphagia at baseline ( $p>0.05$ ), but a significant difference between the two groups was evident after the 3-year follow-up period ( $p<0.05$ ) (B).

178x90mm (300 x 300 DPI)

## With dysphagia

Baseline

Follow-up

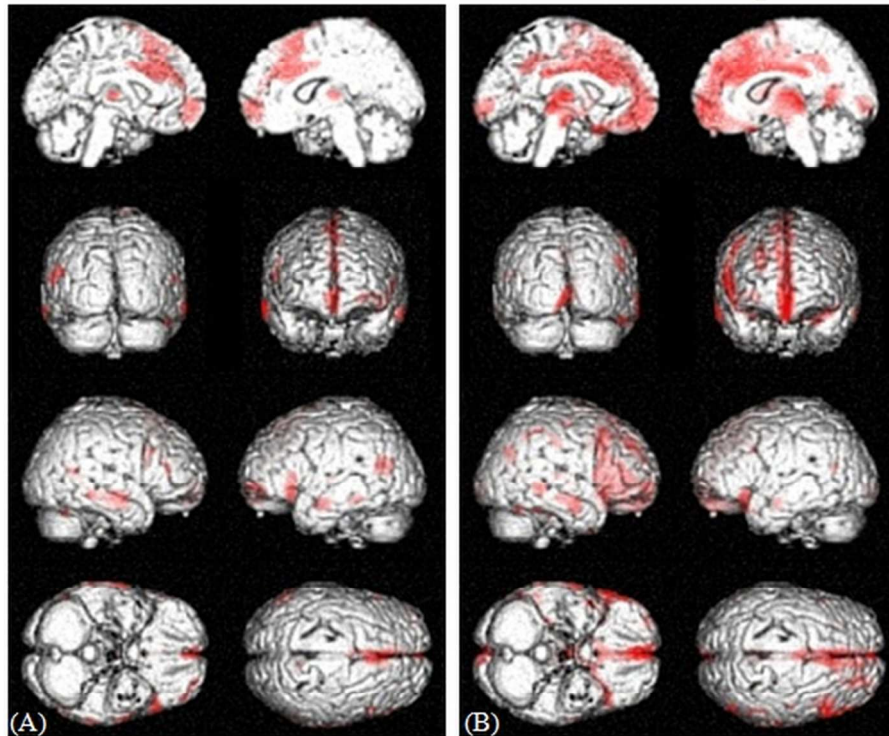uncorrected  $p < 0.001$ ,  $k = 40$ uncorrected  $p < 0.001$ ,  $k = 40$ 

**Cross-sectional analyses of brain maps showing the differences between PD patients with dysphagia and normal control subjects at baseline (A) and after a 3-year follow-up period (B).**

Various areas showed differences in the standardized PET data, and areas with a height threshold of  $p < 0.001$  (uncorrected) and an extent threshold of 40 voxels are illustrated. A comparison of regional cerebral glucose metabolism values demonstrated hypometabolism in the SMA and ACC in the PD patients with dysphagia compared with normal control subjects at baseline (uncorrected  $p < 0.001$ , threshold=40 voxels) (A). After the 3-year follow-up period, the areas of hypometabolism included not only the SMA and the ACC but also the bilateral medial frontal lobes, middle cingulate cortex, thalamus and right superior, middle, inferior, and orbital frontal gyri (uncorrected  $p < 0.001$ , threshold=40 voxels) (B).

95x90mm (300 x 300 DPI)

## Without dysphagia

Baseline

Follow-up

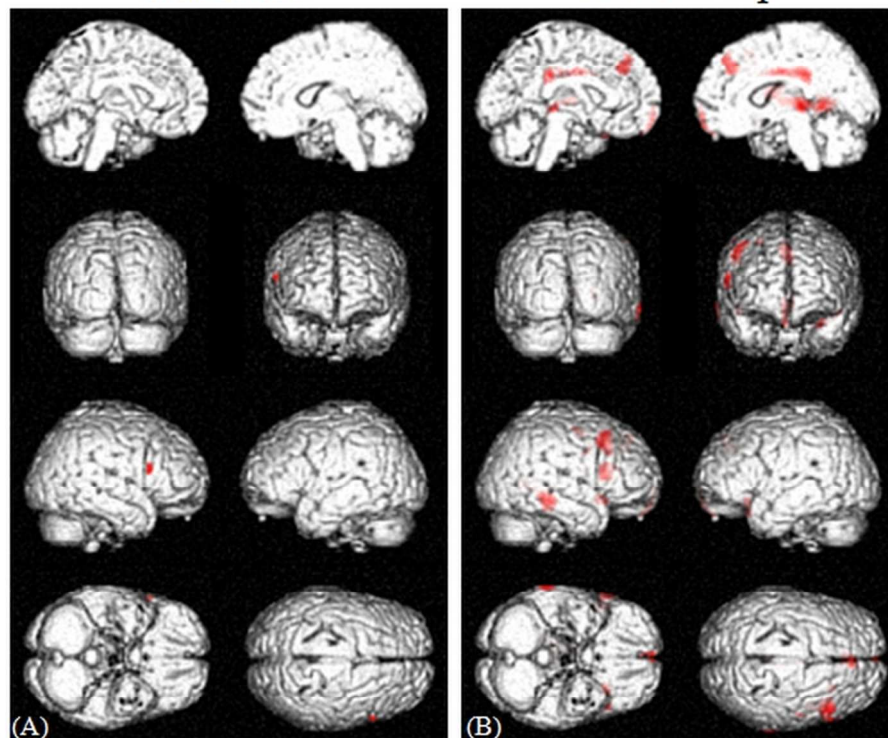uncorrected  $p < 0.001$ ,  $k = 40$ uncorrected  $p < 0.001$ ,  $k = 40$ 

**Cross-sectional analyses of brain maps showing differences between PD patients without dysphagia and normal control subjects at baseline (A) and after a 3-year follow-up period (B).**

Various areas showed differences in the standardized PET data, and areas with a height threshold of  $p < 0.001$  (uncorrected) and an extent threshold of 40 voxels are illustrated. The PD patients without dysphagia showed virtually no hypometabolism at baseline (uncorrected  $p < 0.001$ , threshold=40 voxels) (A) and only a small degree of hypometabolism in the SMA and ACC after the 3-year follow-up period (uncorrected  $p < 0.001$ , threshold=40 voxels) (B) compared with normal control subjects. 95x90mm (300 x 300 DPI)



**STROBE 2007 (v4) checklist of items to be included in reports of observational studies in epidemiology\***  
**Checklist for cohort, case-control, and cross-sectional studies (combined)**

| Section/Topic             | Item # | Recommendation                                                                                                                                                                                                                                                                                                                                                                                                                                                         | Reported on page # |
|---------------------------|--------|------------------------------------------------------------------------------------------------------------------------------------------------------------------------------------------------------------------------------------------------------------------------------------------------------------------------------------------------------------------------------------------------------------------------------------------------------------------------|--------------------|
| Title and abstract        | 1      | (a) Indicate the study's design with a commonly used term in the title or the abstract                                                                                                                                                                                                                                                                                                                                                                                 | 1-2                |
|                           |        | (b) Provide in the abstract an informative and balanced summary of what was done and what was found                                                                                                                                                                                                                                                                                                                                                                    | 2                  |
| <b>Introduction</b>       |        |                                                                                                                                                                                                                                                                                                                                                                                                                                                                        |                    |
| Background/rationale      | 2      | Explain the scientific background and rationale for the investigation being reported                                                                                                                                                                                                                                                                                                                                                                                   | 4                  |
| Objectives                | 3      | State specific objectives, including any pre-specified hypotheses                                                                                                                                                                                                                                                                                                                                                                                                      | 4                  |
| <b>Methods</b>            |        |                                                                                                                                                                                                                                                                                                                                                                                                                                                                        |                    |
| Study design              | 4      | Present key elements of study design early in the paper                                                                                                                                                                                                                                                                                                                                                                                                                | 5                  |
| Setting                   | 5      | Describe the setting, locations, and relevant dates, including periods of recruitment, exposure, follow-up, and data collection                                                                                                                                                                                                                                                                                                                                        | 5                  |
| Participants              | 6      | (a) <i>Cohort study</i> —Give the eligibility criteria, and the sources and methods of selection of participants. Describe methods of follow-up<br><i>Case-control study</i> —Give the eligibility criteria, and the sources and methods of case ascertainment and control selection. Give the rationale for the choice of cases and controls<br><i>Cross-sectional study</i> —Give the eligibility criteria, and the sources and methods of selection of participants | 5                  |
|                           |        | (b) <i>Cohort study</i> —For matched studies, give matching criteria and number of exposed and unexposed<br><i>Case-control study</i> —For matched studies, give matching criteria and the number of controls per case                                                                                                                                                                                                                                                 | 5                  |
| Variables                 | 7      | Clearly define all outcomes, exposures, predictors, potential confounders, and effect modifiers. Give diagnostic criteria, if applicable                                                                                                                                                                                                                                                                                                                               | 5                  |
| Data sources/ measurement | 8*     | For each variable of interest, give sources of data and details of methods of assessment (measurement). Describe comparability of assessment methods if there is more than one group                                                                                                                                                                                                                                                                                   | 5-7                |
| Bias                      | 9      | Describe any efforts to address potential sources of bias                                                                                                                                                                                                                                                                                                                                                                                                              | 5                  |
| Study size                | 10     | Explain how the study size was arrived at                                                                                                                                                                                                                                                                                                                                                                                                                              |                    |
| Quantitative variables    | 11     | Explain how quantitative variables were handled in the analyses. If applicable, describe which groupings were chosen and why                                                                                                                                                                                                                                                                                                                                           | 5                  |
| Statistical methods       | 12     | (a) Describe all statistical methods, including those used to control for confounding                                                                                                                                                                                                                                                                                                                                                                                  | 6-7                |
|                           |        | (b) Describe any methods used to examine subgroups and interactions                                                                                                                                                                                                                                                                                                                                                                                                    | 5-7                |
|                           |        | (c) Explain how missing data were addressed                                                                                                                                                                                                                                                                                                                                                                                                                            | 5                  |
|                           |        | (d) <i>Cohort study</i> —If applicable, explain how loss to follow-up was addressed<br><i>Case-control study</i> —If applicable, explain how matching of cases and controls was addressed                                                                                                                                                                                                                                                                              | 5                  |

|                          |     |                                                                                                                                                                                                              |      |
|--------------------------|-----|--------------------------------------------------------------------------------------------------------------------------------------------------------------------------------------------------------------|------|
|                          |     | <i>Cross-sectional study</i> —If applicable, describe analytical methods taking account of sampling strategy                                                                                                 |      |
|                          |     | (e) Describe any sensitivity analyses                                                                                                                                                                        |      |
| <b>Results</b>           |     |                                                                                                                                                                                                              |      |
| Participants             | 13* | (a) Report numbers of individuals at each stage of study—eg numbers potentially eligible, examined for eligibility, confirmed eligible, included in the study, completing follow-up, and analysed            | 7    |
|                          |     | (b) Give reasons for non-participation at each stage                                                                                                                                                         | 7    |
|                          |     | (c) Consider use of a flow diagram                                                                                                                                                                           | 7    |
| Descriptive data         | 14* | (a) Give characteristics of study participants (eg demographic, clinical, social) and information on exposures and potential confounders                                                                     | 7-8  |
|                          |     | (b) Indicate number of participants with missing data for each variable of interest                                                                                                                          | 7    |
|                          |     | (c) <i>Cohort study</i> —Summarise follow-up time (eg, average and total amount)                                                                                                                             | 7    |
| Outcome data             | 15* | <i>Cohort study</i> —Report numbers of outcome events or summary measures over time                                                                                                                          | 7    |
|                          |     | <i>Case-control study</i> —Report numbers in each exposure category, or summary measures of exposure                                                                                                         |      |
|                          |     | <i>Cross-sectional study</i> —Report numbers of outcome events or summary measures                                                                                                                           | 7    |
| Main results             | 16  | (a) Give unadjusted estimates and, if applicable, confounder-adjusted estimates and their precision (eg, 95% confidence interval). Make clear which confounders were adjusted for and why they were included |      |
|                          |     | (b) Report category boundaries when continuous variables were categorized                                                                                                                                    |      |
|                          |     | (c) If relevant, consider translating estimates of relative risk into absolute risk for a meaningful time period                                                                                             |      |
| Other analyses           | 17  | Report other analyses done—eg analyses of subgroups and interactions, and sensitivity analyses                                                                                                               |      |
| <b>Discussion</b>        |     |                                                                                                                                                                                                              |      |
| Key results              | 18  | Summarise key results with reference to study objectives                                                                                                                                                     | 9    |
| Limitations              | 19  | Discuss limitations of the study, taking into account sources of potential bias or imprecision. Discuss both direction and magnitude of any potential bias                                                   | 11   |
| Interpretation           | 20  | Give a cautious overall interpretation of results considering objectives, limitations, multiplicity of analyses, results from similar studies, and other relevant evidence                                   | 9-10 |
| Generalisability         | 21  | Discuss the generalisability (external validity) of the study results                                                                                                                                        | 11   |
| <b>Other information</b> |     |                                                                                                                                                                                                              |      |
| Funding                  | 22  | Give the source of funding and the role of the funders for the present study and, if applicable, for the original study on which the present article is based                                                | 11   |

\*Give information separately for cases and controls in case-control studies and, if applicable, for exposed and unexposed groups in cohort and cross-sectional studies.

**Note:** An Explanation and Elaboration article discusses each checklist item and gives methodological background and published examples of transparent reporting. The STROBE checklist is best used in conjunction with this article (freely available on the Web sites of PLoS Medicine at <http://www.plosmedicine.org/>, Annals of Internal Medicine at <http://www.annals.org/>, and Epidemiology at <http://www.epidem.com/>). Information on the STROBE Initiative is available at [www.strobe-statement.org](http://www.strobe-statement.org).
